# Supplementary material for: Social acceptance and perceived ecosystem services of urban agriculture in Southern Europe: The case of Bologna, Italy
Source: PLoS One. 2018 Sep 12;13(9):e0200993. doi: 10.1371/journal.pone.0200993 (PMC6135350; doi:10.1371/journal.pone.0200993)
Supplement: S3 File — (XLSX) [file pone.0200993.s003.xlsx]

## Sheet: 0_CODING
Code	Questionnaire
	1. If you think at your neighbourhood, in general, what would you say is missing:
1 NE_COMMERCIAL	Commercial areas (e.g. shopping malls)
1 NE_EDU	Educational areas (e.g. schools)
1 NE_RESI	Residential areas (e.g. new buildings)
1 NE_INDU	Industrial areas (e.g. work places)
1 NE_HEALTH	Health areas (e.g. hospitals)
1 NE_RECRE	Recreational areas (e.g. parks)
1 NE_PUB_CULT	Public cultural spaces (e.g. library, museum)
1 NE_FINANCE	Finantial services (e.g. banks)
1 NE_ADMIN	Public administration services (e.g. public offices)
1 NE_ENTERTAIN	Entertainment services (e.g. cinemas, bars)
2 PREV_KNOW	2. Have you already hear about the term “urban agriculture”?
3 DEF	3. “Yes” answer: How would you explain/define it? “No” answer: What do you think UA is like?
	4. What of the following uses of green and open spaces would you like to have in your living surrounding? Valuation from 1 – strongly agree - to 5 – strongly disagree.
4 USEPARK_PARK	Public parks (for leisure and recreation)
4 USEPARK_CONSERV	Areas for nature protection and nature conservation
4 USEPARK_DEMONST	Demonstrative gardens (Maize- labyrinth, demonstration plots, educational trails)
4 USEPARK_MEADOWS	Meadows (for sheep, cattle, horses, donkeys)
4 USEPARK_INTERCULT	Public accessible intercultural gardens (volunteer initiatives)
4 USEPARK_RESID	Residential gardens (rental plots for inhabitants)
4 USEPARK_IntensiveAgri	Agricultural farms (intensive agricultural and horticultural landscapes)
4 USEPARK_PERIURBAN	UA in the urban periphery
4 USEPARK_PERIPARK	UA in agricultural parks in the periphery
4 USEPARK_PickYourOwn	UA in Pick-your-own projects
4 USEPARK_VacantLands	UA on inner-city brownfields
4 USEPARK_PublicParks	UA in public parks
4 USEPARK_Container	UA in mobile modules (all around the city)
4 USEPARK_Private garden	UA in backyards (for residents or groups of residents)
4 USEPARK_PrivateRoofGarden	Private rooftop gardens
4 USEPARK_RoofFarms	Rooftop farms (commercial)
4 USEPARK_RooftopGreenhouse	UA in rooftop greenhouses
4 USEPARK_Acquaponics	UA in aquaponic farms (where fish and vegetables are produced)
4 USEPARK_VerticalFarm	UA in vertical farms (multi-storey buildings where the building is 100% devoted to food production)
4 USEPAK_SocialExclusion	Social UA for groups in social exclusion risk (migrants, youth)
	5. Now we speak about different production systems that can be used in UA. How is your attitude towards the following production systems and orientations? Valuation from 1 – strongly aprove - to 5 – strongly reject.
PRODUCTION_Greenhouse	Use of greenhouse
PRODUCTION_soilless	Use of soil-less production
PRODUCTION_MGO	Use of GMOs
PRODUCTION_Resources	Resource oriented organic farming (use of rain water, waste heat, renewable energy)
PRODUCTION_Biological	Organic farming (pesticides and fertilizer)
PRODUCTION_Extensive	Extensive vegetable production
PRODUCTION_Intensive_Vege	Intensive vegetable production
PRODUCTION_Intensive_Animal	Intensive animal production
	6a. Now, I will name diverse products that can be produced in cities. Could you give us your opinion regarding: - what products do you know (seen or listen about) can be produced in Bologna?
KNOW_vegetables	Vegetables, open ground
KNOW_GH_products	Vegetables, greenhouse
KNOW_fruit	Fruits and wine, orchards
KNOW_milk	Milk/cheese
KNOW_honey	Honey
KNOW_whool	Wool
KNOW_egg	Eggs
KNOW_meat	Meat
KNOW_seeds	Arable crops (wheat, potatoes,..)
KNOW_special	Specialty products (mushrooms, sprouts, herbs)
KNOW_acquaponics	Aquaponic (fish and vegetables)
	6b. Which products would you approve to be produced through UA in Bologna?
ACCEPT_vegetables	Vegetables, open ground
ACCEPT_GH_products	Vegetables, greenhouse
ACCEPT_fruit	Fruits and wine, orchards
ACCEPT_milk	Milk/cheese
ACCEPT_honey	Honey
ACCEPT_whool	Wool
ACCEPT_egg	Eggs
ACCEPT_meat	Meat
ACCEPT_seeds	Arable crops (wheat, potatoes,..)
ACCEPT_special	Specialty products (mushrooms, sprouts, herbs)
ACCEPT_acquaponics	Aquaponic (fish and vegetables)
	6c. Which products would you be willing to buy from UA in Bologna?
BUY_vegetables	Vegetables, open ground
BUY_GH_products	Vegetables, greenhouse
BUY_fruit	Fruits and wine, orchards
BUY_milk	Milk/cheese
BUY_honey	Honey
BUY_whool	Wool
BUY_egg	Eggs
BUY_meat	Meat
BUY_seeds	Arable crops (wheat, potatoes,..)
BUY_special	Specialty products (mushrooms, sprouts, herbs)
BUY_acquaponics	Aquaponic (fish and vegetables)
CHOOSE_Motivation	7. What aspects would make you buy UA products instead of products from conventional agriculture? (Choose the most important factor for your decision)
WTP	8. Now we value the willingness to pay. When 1kg of onions from conventional and imported agriculture costs 1€ in the supermarket, how would you be willing to pay for 1kg of onions from UA produced and sold in Bologna?
	9. Considering now the different risks associated to UA. What is your opinion related to these impatcs, according to the following statements? Valuation from 1 – stongly agree - to 5 – strongly disagree.
RISK_AirContamination	Air contamination (industries, mobility)
RISK_SoilContamination	Soil contamination
RISK_Soilless_unnatural	Soil-less growing is an ‘‘unnatural’’ way of producing
RISK_Competition_agriculture	Competition with rural farmers
RISK_Competition_uses	Competition with other uses (like solar energy on the roof, or spaces in the city for parks, residential areas etc.)
RISK_AnimalManagement	Leads to non- appropriate animal keeping
RISK_Noise_Vege	Leads to increased noise, dirt and smell due to vegetal production
RISK_Noise_animal	Leads to increased noise, dirt and smell due to animal production
	10. Please, value the different ecosystem services associated to urban food systems by answering the following statement: “Urban food systems contribute to…”. Value scale from 1 – strongly disagree - to 5 –strongly agree.
ES_E_Food	Provision of Food
ES_E_Medicine	Provision of Medicine and aromatic plants
ES_E_RawMaterial	Provision of Other raw materials (e.g. wool)
ES_E_LocalClima	Improvement of Local climate
ES_E_AirQuality	Improvement of air quality
ES_E_CarbonSeq	Facilitation of Carbon sequestration and storage
ES_E_Pollination	Facilitation of Pollination
ES_E_Biological_control	Facilitation of Biological pest controlo
ES_E_ExtremeEvents	Reduction of the effects of extreme events (e.g., flood, hurricane)
ES_E_Soil	Prevention of soil erosion and maintenance of soil fertility
ES_E_UrbanMetabolism	Regulation of the urban metabolism (e.g., waste, water and nutrient flows)
ES_E_Hab4animals	Habitat for animal species
ES_E_Genetics	Conservation of genetic variability
ES_E_Local_Biod	Increase of global biodiversity
	11. Please, value the different ecosystem services associated to urban food systems by answering the following statement: “Urban food systems contribute to…”. Value scale from 1 – strongly disagree - to 5 –strongly agree.
ES_S_Training	Education and training
ES_S_Recreation	Recreation and entertainment
ES_S_Tourism	Improvement of urban tourist attraction
ES_S_Psico	Improvement of Mental health (relax, stress)
ES_S_Physical	Improvement of Physical health
ES_S_Nature	Improvement of Contact with nature and spiritual experiences
ES_S_UrbanAesthetics	Urban aesthetics and cultural/art inspiration
ES_S_Knowledge	Maintenance of traditional knowledge and cultural heritage (e.g., local varieties, production techniques, etc.)
ES_S_Community	Improvement of Community building
ES_S_Cohesion	Improvement of social cohesion
ES_S_Placement	Improvement of place attachment
ES_S_Politics	Contribution to political realization
Urban_image_change	12. Do you think that UA can improve the image of your city?
	13. Could you imagine to participate in UA? How? (multiple entries possible)
PART_Produce	Own production of products
PART_Buy	Buying products
PART_Distrib	Distributing products
PART_Funding	providing financial support
PART_Educ	attending educational and training programs
PART_Relax	using the space for relaxation
PART_EventOrg	organising events
PART_Other	other___________________________________
PART_No part	I won’t participate
PART_area	14. In which area would you participate or contribute in an UA project?
	Socio-demographic data
S_Sex	Sex
S_Age	Age
S_Income	Household income (monthly)
S_PersonsHome	Number of people living at your household unit:

## Sheet: 1_Raw_responses
Date	1 NE_COMMERCIAL	1 NE_EDU	1 NE_RESI	1 NE_INDU	1 NE_HEALTH	1 NE_RECRE	1 NE_PUB_CULT	1 NE_FINANCE	1 NE_ADMIN	1 NE_ENTERTAIN	2 PREV_KNOW	3 DEF [Italian]	4 USEPARK_PARK	4 USEPARK_CONSERV	4 USEPARK_DEMONST	4 USEPARK_MEADOWS	4 USEPARK_INTERCULT	4 USEPARK_RESID	4 USEPARK_	4 USEPARK_IntensiveAgri	4 USEPARK_PERIURBAN	4 USEPARK_PERIPARK	4 USEPARK_PickYourOwn	4 USEPARK_VacantLands	4 USEPARK_PublicParks	4 USEPARK_Container	4 USEPARK_Private garden	4 USEPARK_PrivateRoofGarden	4 USEPARK_RoofFarms	4 USEPARK_RooftopGreenhouse	4 USEPARK_Acquaponics	4 USEPARK_VerticalFarm	4 USEPAK_SocialExclusion	PRODUCTION_Greenhouse	PRODUCTION_soilless	PRODUCTION_MGO	PRODUCTION_Resources	PRODUCTION_Biological	PRODUCTION_Extensive	PRODUCTION_Intensive_Vege	PRODUCTION_Intensive_Animal	KNOW_vegetables	KNOW_GH_products	KNOW_fruit	KNOW_milk	KNOW_honey	KNOW_whool	KNOW_egg	KNOW_meat
31/10					Yes						Yes		2	2	2	4	2	2		2	3	2	2	2	2	2	2	3	2	2	2	2	2	2	2	3	2	2	3	3	4	Yes	Yes	Yes		Yes		Yes
31/10	Yes	Yes	No	No	Yes	No	Yes	No	No	Yes	Yes	Là possibilità di produrre il n città con tecniche diverse dalla campagna	1	1	1	5	1	1		1	1	1	1	1	1	1	1	1	1	1	1	1	1	2	2	3	1	1	2	3	4	Yes	Yes	Yes	No	No	No	Yes	No
31/210										Yes	No	Agricoltura fatta in città con le risorse che si hanno	2	1	2	3	2	1		2	2	3	2	2	2	1	1	1	2	2	3	-99	1	2	1	5	2	2	3	5	4
31/10					Yes						Yes	Coltivare in città	1	1		5	1	1		1	1	1	1	1	1	1	1	1	1	1	1	1	1	2	2	3	1	1	2	3	4	Yes		Yes	Yes	Yes	No	Yes	No
2/11	Yes	Yes	No	Yes	Yes	Yes	Yes	No	No	Yes	Yes	Poter coltivare in città	1	1	1	4	1	1		1	4	1	1		1	1	1	1	1	1	1	1	1	2	2	4	1	1	1	2	3	Yes	Yes	Yes	I don't know	I don't know	I don't know	I don't know	I don't know
2/11	Yes	Yes	No	No	Yes	Yes	Yes	No	No	Yes	No		1	1	2	5	1	1		1	3	1	1	1	3	1	1	3	2	1	1	3	2	2	2	3	2	1	1	1	3	Yes	Yes	Yes	Yes	Yes	Yes	Yes	Yes
2/11	Yes	Yes	No	No	No	Yes	Yes	No	No	Yes	Yes		1	1	2	4	1	1		1	4	1	1	1	2	1	1	2	2	1	1	2	2	2	2	5	1	1	2	2	3	Yes	Yes	Yes	I don't know	I don't know	I don't know	I don't know	I don't know
2/11	No	Yes	No	No	No	Yes	No	No	No	Yes	Yes		1	1	1	5	1	1		3	1	1	1	1	1	1	1	1	2	1	1	1	1	1	1	3	1	1	2	2	3	Yes	Yes	Yes	Yes	I don't know	No	Yes	I don't know
2/11	No	Yes	No	No	No	Yes	No	No	No	Yes	Yes	Progetti di verde urbano	1	2	1	5	1	1	-99	3	1	2	1	1	1	1	2	1	1	1	1	1	1	2	2	4	1	1	2	2	2	Yes	Yes	Yes	Yes	I don't know	I don't know	Yes	Yes
2/11	Yes	Yes	No	No	No	Yes	Yes	No	No	Yes	No		1	2	2	5	1	1		1	1	1	1	1	1	1	1	1	1	1	1	1	1	1	1	4	1	1	1	1	2	Yes	Yes	Yes	Yes	Yes	Yes	Yes	Yes
2/11	Yes	Yes	No	Yes	Yes	Yes	Yes	No	Yes	Yes	Yes		1	1	1	4	1	1		1	1	1	1	1	1	1	1	1	1	1	1	1	1	1	1	3	1	1	1	2	3	Yes	Yes	Yes	Yes	No	I don't know	Yes	No
2/11	No	No	No	No	No	Yes	Yes	No	No	Yes	No		1	1	1	4	1	1		1	1	2	1	2	2	1	1	1	2	1	2	1	1	1	2	3	1	1	1	1	1	Yes	Yes	Yes	No	I don't know	I don't know	Yes	Yes
4/11	No	No	No	No	No	Yes	No	No	No	Yes	Yes		1	1	2	4	1	1		3	1	1	1	1	1	1	1	1	1	1	1	1	1	2	2	3	1	1	2	2	3	Yes	Yes	Yes	Yes	I don't know	I don't know	Yes	Yes
4/11	No	No	No	No	No	Yes	Yes	No	No	No	Yes	Attività inerenti alla natura	1	1	1	3	1	1		1	1	1	1	1	1	1	1	1	1	1	1	1	1	1	1	2	1	1	1	1	2	Yes	Yes	Yes	Yes	I don't know	I don't know	I don't know	I don't know
4/11	No	No	No	No	No	No	Yes	No	No	Yes	No		1	1	1	3	1	1		2	2	1	1	1	1	1	2	2	1	1	1	1	2	1	1	5	1	1	1	3	3	I don't know	Yes	Yes	Yes	Yes	No	Yes	Yes
4/11	No	Yes	No	No	No	Yes	Yes	No	No	Yes	No			1	1	4	1	1	2	2	2	1	1	1	1	1	1	2	1	1	1	1	1	2			1		2	3	4	Yes	Yes	Yes	Yes	Yes	I don't know	I don't know	I don't know
4/11	No	Yes	No	No	No	Yes	Yes	No	No	Yes	Yes	Cerchi di mettere nel contesto urbano orti	1	1	1	1	1	1		3	1	1	1	1	1	1	1	2	1	1	2	1	3	2	2	5	1	1	2	2	3	I don't know	I don't know	Yes	Yes	Yes	Yes	Yes	Yes
4/11	No	No	No	No	No	Yes	Yes	No	No	Yes	Yes	Poter produrre in città	1	1	2	4	1	1		1	1	2	1	1	2	1	1	2		1	2	1	1	1	1	3	1	1	1	3	4	Yes	Yes	Yes	Yes	Yes	I don't know	Yes	Yes
4/11	No	Yes	No	No		Yes	Yes	No	No	No	Yes	Produzione in verticale	2	1	2	3	2	3		2	2	2	1	1	3	2	1	1	2	1	4	4	2	1	1	3	1	1	3	2	4	Yes	Yes	Yes	Yes	I don't know	I don't know	I don't know	I don't know
4/11	No	Yes	No	No	Yes	Yes	No	No	No	Yes	Yes	Coltivare in palazzi	1	1	2	4	2	1		2	2	2	1	1	4	1	3	3	1	1	3	-99	2	3	3	4	2	1	4	3	4	Yes	No	I don't know	Yes	I don't know	I don't know	I don't know	I don't know
4/11	No	No	No	No	No	Yes	Yes	No	No	Yes	Yes	Produrre verde in città	1	1	1	2	1	1	1	1	1	2	1	1	1	2	1	1	1	2	2	1	1	1	1	3	1	1	1	2	3	Yes	Yes	Yes	Yes	I don't know	I don't know	Yes	Yes
7/11	No	No	No	No	No	Yes	No	No	No	Yes	No		1	1	2	1	2	2		1	2	1	1	1	2	1	1	1	1	1	2	2	2	1	2	2	1	1	1	2	2	Yes	Yes	Yes	No	No	No	No	No
7/11	No	Yes	No	No	No	Yes	No	No	No	Yes	Yes	Poter coltivare in città	1	1	1	4	1	1		1	1	1	1	1	1	1	1	1	1	1	1	1	1	1	2	2	1	1	1	2	2	Yes	Yes	Yes	No	No	No	No	No
7/11	No	No	No	No	No	No	Yes	No	No	No	Yes	cer arte di rendere più verde la citta	1	1	1	3	1	3	3	3	3	-99	-99	2	-99	-99	3	5	-99	1	1	-99	-99	1	2	4	1	1				Yes	No	Yes	Yes	Yes	Yes	Yes	Yes
7/11	No	No	No	No	No	No	No	No	No	Yes	No		1	1	1	1	1	1		1		1	2	2	2	1	1	2	2	1	2	1	1	2	2	3	1	1	1	1	5
7/11	No	No	No	No	No	No	No	No	No	Yes	No		1	1	1	1	1	1		1		1												2	2	3	1	1	1	1	5
7/11	No	No	No	No	No	No	Yes	No	No	No	Yes		1	1	1	1	1	1		1	2	1	2	2	2	1	1	2	1	1	2	1	1	1	1	1	1	1	1	1	2
7/11	No	No	No	No	No	No	Yes	No	No	No	Yes		1	1	1	1	1	1		1	2	1	2	2	2	1	1	2	1	1	2	1	1	1	1	1	1	1	1	1	2
10/11	Yes	No	No	No	No	Yes	Yes	No	No	Yes	Yes	Sono zone verdi nella città	1	1	1	4	1	1		1	2	1	1	1	1	1	2	1	1	1	1	2	1	1	1	3	1	1	1	2	3	Yes	Yes	Yes	Yes	I don't know	No	Yes	I don't know
10/11	Yes	Yes	No	No	Yes	Yes	No	Yes	No	No	No		1	1	2		1	2	2	1	2	2	1	2	1	2	1	1	2	1	1	1	1	1	1	3		1	2	2	2	Yes	Yes	Yes	Yes	Yes	Yes	Yes	Yes
10/11	Yes	No	No	No	Yes	Yes	Yes	No	No	Yes	No		1	1	1	4	1	1		1	1	2	1	1	1	1	2	1	1	1	2	2	1	2	3	3	2	2	1	1	2	Yes	Yes	Yes	Yes	I don't know	I don't know	Yes	Yes
7/11	No	No	No	No	No	No	Yes	No	No	No	Yes		1	1	1	1	1	1		1	2	1	2	2	2	1	1	2	1	1	2	1	1	1	1	1	1	1	1	1	2
10/11	Yes	No	No	No	Yes	Yes	Yes	No	No	Yes	No		1	1	1	4	1	1		1	1	2	1	1	1	1	2	1	1	1	2	2	1	2	3	3	2	2	1	1	2	Yes	Yes	Yes	Yes	I don't know	I don't know	Yes	Yes
10/11	Yes	No	No	No	Yes	Yes	Yes	No	No	Yes	No		1	1	1	4	1	1		1	1	2	1	1	1	1	2	1	1	1	2	2	1	2	3	3	2	2	1	1	2	Yes	Yes	Yes	Yes	I don't know	I don't know	Yes	Yes
10/11	No	No	No	No	Yes	Yes	Yes	No	No	Yes	Yes	Attività di giardinaggio	1	3	3	4	1	1		2	1	1	1	1	1	1	3	4	3	3	3	2	1	3	3	4	2	2	1	1	2	Yes	Yes	Yes	Yes	Yes	I don't know	Yes	Yes
10/11	No	No	No	No	Yes	Yes	Yes	No	No	Yes	No		1	1	2	3	1	1		1	1	2	1	1	1	1	2	2	1	1	2	1	1	2	2	4	2	2	1	1	2	Yes	Yes	Yes	Yes	Yes	Yes	Yes	Yes
10/11	No	No	No	No	No	No	Yes	No	No	Yes	No		2	2	3	4	2	2		1	2	2	2	3	2	1	1	2	2	1	2	3	2	4	4	5	2	3	2	2	2	Yes	Yes	Yes	Yes	No	I don't know	No	Yes
10/11	Yes	Yes	No	No	No	Yes	Yes	No	No	No	Yes	Lavorare in città le zone verdi	1	2	1	3	2			1	2	2	2	2	2	2	2	3	3	3	3	3	2	2	2	4	1	1	2	2	3	Yes		Yes	Yes	I don't know	I don't know	No	No
10/11	Yes	Yes	Yes	Yes	Yes	Yes	Yes	No	No	Yes	No		2	2	1	4	1	2		2	2	3	3	2	1	2	3	1	1	1	2	2	1	2	2	4	1	1	2	2	3	Yes	I don't know	Yes	Yes	I don't know	I don't know	I don't know	I don't know
10/11	No	No	No	Yes	No		No	No	No	Yes	No		1	2	1	2	2	2		2	1	1	1	2	2	1	1	1	1	2	3	2	1	2	3	2	2	2	2	3	3	Yes	No		No	Yes		Yes	Yes
10/11	Yes	Yes	No	No	No	Yes	Yes	No	No	Yes	No			2	1	4	3	2		1	2	2	2	2	3	3	2	1	1	2	1	2	3	2	2	3	2	1	1	2	3	Yes	Yes	Yes	Yes	Yes	Yes	Yes	Yes
10/11	Yes	No	No	No	Yes	Yes		Yes	No	Yes	Yes	Avere spazi verdi in città	1	2	1	2	1	2	1	2	1	1	1	1	1	1	2	1	2	1	1	1	1	2	2	3	2	1	1	1	2	Yes	Yes	No	I don't know	No	No	No	Yes
24/10	No	No	No	No	Yes	No	No	No	No	Yes	Yes	sono orti comunali, gardening	1	1	1	5	1	1		1	1	1	1	1	1	1	1	1	1	1	1	1	1	1	1	5	1	1	1	5	3			Yes
24/10	No	Yes	No	No	Yes	No	No	No	No	No	No	coltivare nel proprio giardino	1	1	2	5	3	1		1	1	1	3	2	5	5	1	1	3	2	5	5	5	2	3	5	2	2	3	4	5
12/11	Yes	No	No	Yes	Yes	No	No	No	No	Yes	Yes	Imparare il contatto con la natura in città	1	2	1	2	1	2		1	1	1	1	1	1	1	1	2	1	1	1	2	2	2	2	3	2	3	2	2	3	Yes	Yes	Yes	No	No	Yes	I don't know	I don't know
12/11	Yes	No	No	Yes	Yes	Yes	Yes	No	No	Yes	No		1	2	1	2	1	1		1	2	2	1	1	2	2	3	1	2	3	1	2	2		2	2	2	2	2	2	2	Yes	Yes	Yes	Yes	Yes	Yes	Yes	Yes
12/11	Yes	Yes	No	No	Yes	Yes	Yes	No	No	Yes	Yes	Zone verdi in città	1	2	3	2	1	2		2	2	2	1	2	2	1	2	3	3	2	1	1	1	1	2	2	2	2	2	1	2	Yes	Yes	No	I don't know	I don't know	I don't know	I don't know
12/11	Yes	Yes	No	No	No	Yes	Yes	Yes	No	No	No		1	2			2	1		1	2	2	2	2	2	2	1	1	1	1	1	1	1	1	2	3	2	2	1	1	2	Yes	Yes	No	No	I don't know	No	Yes	Yes
12/11	Yes	No	Yes	Yes	No	Yes	Yes	No	No	Yes	No		1	2	2	3	2	1		1	1	1	1	1	1	1	1	1	1	1	1	1	1	1	2	4	1	1	1	1	1	Yes	Yes	No	Yes	No	No	No	I don't know
12/11	Yes	Yes	No	No	No	Yes	Yes	No	No	Yes	Yes	Inserimento sociale tramite il giardinaggio	1	1	1	4	1	1		2	1	1	1	1	1	2	2	2	2	2	1	2	1	2	1	4	1	1	1	2	3	Yes	Yes	Yes	Yes	No	No	No	Yes
12/11	Yes	Yes	No	No	No	Yes	Yes	No	No	Yes	No		1	1	1	3	1	1		1	1	1	1	1	1	1	1	1	1	1	1	1	1	2	2	3	1	1	1	1	2	Yes	Yes	Yes	Yes	Yes	I don't know	I don't know	I don't know
12/11	Yes	Yes	No	Yes	Yes	Yes	No	Yes	No	Yes	Yes	Coltivare vicino alla città	1	1	1	4	1	1		1	1	1	1	1	1	1	1	1	1	1	1	1	1	2	2	3	1	1	2	3	4	I don't know	Yes	Yes	Yes	I don't know	No	No	I don't know
12/11	No	No	No	No	No	Yes	Yes	No	No	Yes	Yes	Coltivare in casa	1	1	2	3	1	1		1	2	1	1	2	1	1	1	2	1	1	1	2	2	1	2	4	1	1	1	1	4	Yes	Yes	Yes	No	I don't know	I don't know	No	I don't know
12/11	No	No	No	No	No	Yes	Yes	No	No	Yes	Yes		1	1	2	4	1	1		1	2	2	1	1	1	1	2	1	1	2	1	2	1	2	2	4	1	2	2	2	3	Yes	Yes	Yes	I don't know	I don't know	Yes	I don't know	I don't know
12/11	No	No	No	No	No	Yes	Yes	No	No	Yes	Yes		1	1	2	4	1	1		1	2	2	1	1	1	1	2	1	1	2	1	2	1	2	2	4	1	2	2	2	3	Yes	Yes	Yes	I don't know	I don't know	Yes	I don't know	I don't know
12/11	Yes	Yes	No	No	No	Yes	Yes	No	No	Yes	Yes	Coltivare in città	1	1	1	3	1	1		1	1	2	1	1	1	1	2	1	2	2	2	2	1	2	2	4	1	1	2	3	4	Yes	Yes	Yes	Yes	Yes	No	Yes	I don't know
12/11	No	No	No	No	No		Yes	No	No	Yes	No		1	1	2	4	1	1		1	1	1	1	1	1	1	1	1	1	1	1	1	1	2	2	3	1	1	2	2	2	Yes	Yes	Yes	Yes	I don't know	I don't know	Yes	Yes
12/11	Yes	Yes	No	No	Yes	No	Yes	Yes	No	Yes	No		1	2	1	3	2	1		1	1	2	3	1	2	1	2	1	1	1	2	1	1	2	2	4	2	1	1	1	3	Yes	Yes	Yes	Yes	Yes	Yes	Yes	Yes
12/11	Yes	Yes	No	No	Yes	Yes	Yes	No	No	Yes	No		1	1	1	5	1	1		1	1	1	1	1	1	1	2	2	2	2	1	2	1	1	1	3	1	1	1	1	2	Yes	Yes	Yes	Yes	I don't know	I don't know	I don't know	I don't know
12/11	Yes	Yes	No	No	No	Yes	Yes	No	No	Yes	Yes	Zone verdi in città	1	1	2	3	2	1		1	2	1	2	3	2	1	2	3	3	3	2	1	1	2	2	2	2	2	2	2	3	Yes	Yes	I don't know	Yes	I don't know	I don't know	I don't know	I don't know
12/11	Yes	Yes	No	No	No	Yes	No	No	No	No	No		2	2	2	5	3	3		2	3	3	3	2	2	2	3	2	2	2	3	2	1	3	3	4	2	2	2	2	2	Yes	Yes	Yes	Yes	Yes	Yes	Yes	Yes
12/11	Yes	Yes	No	No	No	Yes	No	No	No	No	No		2	2	2	5	3	3		2	3	3	3	2	2	2	3	2	2	2	3	2	1	3	3	4	2	2	2	2	2	Yes	Yes	Yes	Yes	Yes	Yes	Yes	Yes
12/11	No	No	No	No	No	Yes	Yes	No	No	Yes	Yes	Lavorare la terra della città con peatiche agricole	1	2	2	1	2	1		1	2	1	3	2	1	1	2	2	2	1	2	1	1	2	2		1	1	2	2	2	Yes	Yes	Yes	No	No	I don't know	No	No
12/11	No	No	No	No	No	No	No	No	No	No	No		2	2	3	3	3	2		1	1	1	1	2	2	3	2	2	2	1	1	1	1	2	2	2	1	1	1	2	3	Yes	No	No	I don't know	Yes	No	Yes	I don't know
12/11	No	No	No	No	No	No	Yes	No	No	No	Yes	Giardinaggio	2	2	1	2	3	2		3	2	1	1	1	1	1	1	1	1	1	1	1	1	2	1	3	1	1		3	2	I don't know	I don't know	I don't know	I don't know	I don't know	I don't know	I don't know	I don't know
7/11	Yes	No	No	No	No	Yes	No	No	No	No	No		1	1	2	1	1	1		2	3	2	1	1	1	1	1	2	2	2	1	1	1	3	3	4	2	2	1	1	2	Yes	Yes	Yes	Yes	I don't know	I don't know	Yes	Yes
7/11	No	No	No	No	No	Yes	Yes	No	No	Yes	Yes	zone della città dove è possibile coltivare ortaggi	1	1	1	3	1	1		2	1	1	1	1	1	1	1	2	2	2	2	2	1	2	2	4	1	1	2	2	3	Yes	Yes	Yes	Yes	I don't know	I don't know	Yes	Yes
7/11	No	No	No	No	No	No	No	No	No	No	Yes	orti urbani	1	1	2	5	1	1		3	1	1	1	1	1	1	2	2	1	1	1	1	1	2	1	3	1	1	1	2	3	Yes	Yes	Yes	Yes	No	No	I don't know	I don't know
15/11	Yes	No	No	No	Yes	Yes	No	No	Yes	Yes	Yes	La possibilità di coltivare nelle zone della città	2	2	3	2	1	1		2	2	3	2	2	2	1	1	1	1	2	3	2	1	2	2	3	2	1	1	1	3	Yes	Yes	No	No	Yes	Yes	Yes	I don't know
15/11	Yes	No	No	No		Yes	No	No	No	Yes	No		2	1	1	5	2	4			1	2	1	1	2	1	1	3	1	1	1	1	1	2	2	3	2	1	1	3	4	No	I don't know	No	Yes	I don't know	No	No	No
12/11	No	No	No	No	No	No	Yes	No	No	No	Yes	Giardinaggio	2	2	1	2	3	2		3	2	1	1	1	1	1	1	1	1	1	1	1	1	2	1	3	1	1		3	2	I don't know	I don't know	I don't know	I don't know	I don't know	I don't know	I don't know	I don't know
15/11	Yes	No	No	Yes	No	No	Yes	No	No	Yes	No		1	3	2	4	2	2		3	2	2	2	2	4	2	3	3	2	2	2	2	1	1	1	2	1	1	1	1	2	Yes	Yes	Yes	Yes	Yes	Yes	Yes	Yes
15/11	No	No	No	No	No	No	No	No	No	No	Yes	Insegnare a coltivare	2	3	2	5	1	1		1	1	1	1	1	1	1	1	1	1	1	1	1	1	2	3	4	1	1	1	1	3	Yes	Yes	Yes	Yes	Yes	I don't know	Yes	Yes
15/11	No	Yes	No	No	No	Yes	Yes	No	No	No	No	Penso sia il biologico	1	1	1	5	1	1		2	1	1	1	1	1	1	1	1	1	1	1	1	1	3	3	4	2	2	1	1	1	Yes	I don't know	I don't know	Yes	I don't know	I don't know	I don't know	I don't know
15/11	Yes	Yes	No	No	Yes	Yes	Yes	No	No	Yes	Yes	Progetti urbani per sensibilizzare le persone sulla natura	2		3	3	2	1		1	2	1	1	3	2	2	1	2	1	2	2	1	1	2	2	1	2	1	2	1	1	Yes	Yes	No	I don't know	Yes	Yes	I don't know	No
15-11		Yes								Yes	Yes	parchi e orti	2	2	2	2	2	2		1	1	1	2	2	2	3	3	3	2	2	1	1	1	2	2	2	1	1	1	2	3	Yes	Yes	Yes
15-11										No	Yes		1	2	2	2	1	1	1	1	1	1	1	1	1	1	2	2	3	1	1	2	1	2	2	4	1	1	3	3	4	Yes	Yes	Yes	Yes	Yes	Yes	Yes	Yes
15-11		Yes							Yes		No		2	1	1	3	4	4		1	1	1	2	3	1	2	4	1	1	1	1	1	1	3	3	2	2	3	3	3	3
15-11		Yes						Yes			No		1	2	2	1	1	1	1	2	1	2	2	3	3	1	2	2	1	1	1	1	1	1	1	2	2	1	1	1	1	Yes	Yes	Yes	Yes	Yes	Yes	Yes	Yes
15-11		Yes				Yes					Yes		1	1	1	5	3	2		1	1	2	3	2	2	2	3	1	1	1	3	2	1	3	3	3	2	2	3	3	4
12-11						Yes	Yes				Yes		1	1	1	5	1	1		5	2	1	2	1	2	1	1	2	2	2	1	1	1	1	1	2	1	2	1	3	4		Yes	Yes		Yes
12-11							Yes		No	Yes	Yes		1	1	1	4	1	1		5	1	1	1	2	1	1	2	2	1	1	1	1	2	1	1	4	1	1	4	5	5	Yes	Yes	Yes				Yes	Yes
12-11	Yes					Yes					No		1	1	1	4	1	1		5	1	1	1	1	1	5		1	5	1	1	1	1	1	1	5	1	1	5	5	5	Yes	Yes	Yes	Yes
12-11										Yes	Yes		1	1	1	2	1	1		5	1	1	1	1	1	2	1	2	4	1	1	1	1	1	1	1	1	1	1	3	4		Yes	Yes	Yes
12-11				Yes					Yes	Yes	No		1	1	1	5	1	1	1	5	1	1	1	1	1	1	1	1	1	1	1	1	1	1	1	5	1	1	5	5	5	Yes	Yes		Yes
12-11						Yes	Yes			Yes	No		1	1	1	5	1	1		5	1	1	1	1	1	2	1	1	5	2	1	2	1	1	1	5	1	1	5	5	5
12-11							Yes			Yes	Yes		1	1	1	5	1	1		5	1	1	1	1	1	1	2	1	5	1	1	1	1	1	1	1	1	1	1	1	5
12-11					Yes		Yes		Yes	Yes	No		1	1	1	5	1	1		1	1	1	1	1	1	1	1	1	2	1	1	1	1	1	1	5	1	1	1	5	5
12-11						Yes				Yes	No		1	1	1	5	1	1		1	1	1	1	1	4	4	1	1	5	1	1	1	1	1	1	1	1	1	1	2	5	Yes	Yes	Yes	Yes				Yes
12-11						Yes	Yes			Yes	No		1	1	1	5	1	1		1	1	1	1	1	3	3		1	1	1	1	1	1	1	1	2	1	1	1	1	5	Yes	Yes	Yes	Yes			Yes	Yes
12-11						Yes	Yes		No	Yes	Yes		1	1	1	5	1	1		1	1	1	1	1	1	2	2	2	2	1	1	1	1	1	1	2	1	1	1	2	5
12-11						Yes	Yes			Yes	No		1	1	1	5	1	1		1	1	1	1	1	2	3	3	1	4	2	2	2	1	1	1	5	1	1	2	4	5
3-11						Yes	Yes			Yes	Yes	agricoltura da città aperta al pubblico	1	1	1	5	1	1		5	1	1	1	1	1	1	1	4	1	1	3	1	1	1	1	5	1	1	2	5	5	Yes	Yes	Yes	Yes	Yes			Yes
3-11											No		1	1	1	4	1	1		4	1	1	1	1	1	1	1	1	4	1	1	1	1	1	1	5	1	1	1	5	5	Yes	Yes	Yes		No		Yes	Yes
3-11				Yes						Yes	No		1	1	1	3	1	1		1	2	2	1	1	1	2	2	1	1	2	2	2	1	1	1	2	1	1	1	3	3	Yes	Yes	Yes	Yes			Yes	Yes
3-11					Yes		Yes				No		1	1	1	5	1	1		1	1	1	1	1	1	1	1	1	1	1	1	1	1	1	1	3	1	1	1	3	4
3-11						Yes	Yes			Yes	No		1	1	1	4	1	1		1	1	1	1	1	2	1	1	1	2	2	2	1	1	1	1	3	1	1	1	4	4
3-11						Yes					Yes		1	1	1	5	1	1		1	1	1	1	1	1	1	1	1	1	1	1	1	1	1	1	5	1	1	1	4	4	Yes	Yes	Yes	Yes			Yes	Yes
3-11	Yes						Yes			Yes	No		1	2	1	5	1	1		1	1	1	1	1	1	1	1	1	1	1	1	1	1	1	1	5	1	1	2	5	5
3-11						Yes				Yes	No		1	1	1	4	1	1		1	1	1	1	1	1	1	1	1	4	1	1	1	1	1	1	2	1	1	1	5	5	Yes	Yes	Yes	Yes			Yes	Yes
3-11	Yes									Yes	Yes	sistema per valorizzare il verde e portello nelle città	1	1	1	5	5	1		5	5	1	1	1	5	1	1	1	1	1	1	-99	1	2	1	5	1	1	3	5	5	Yes	Yes	Yes	Yes			Yes	Yes
3-11										Yes	No		1	1	1	5	1	1		1	1	1	1	1	1	1	1	1	2	1	1	1	1	1	1	3	1	1	2	2	2
3-11						Yes					No		1	1	1	-99	1	1		5	1	2	2	1	1	1	2	1	1	2	2	2	2	1	1	3	1	1	1	2	5	Yes	Yes	Yes
12-11							Yes				No		1	1	1	4	1	1		4	1	1	1	1	2	3	1	1	5	3	1	3	1	1	1	4	1	1	1	2	5	Yes	Yes	Yes	Yes			Yes	Yes
14-11							Yes			Yes	No		1	2	2	3	1	1		2	2	2	1	1	1	2	1	1	1	2	1	1	1	2	1	3	1	1	3	3	4				Yes
16/11	Yes	Yes	No	No	No	Yes	Yes	No		Yes	Yes	riutilizzare il verde urbano	1	2	2	4	2	2		3	2	2	1	1	1	1	3	3	2	2	1	2	1	2	2	4	1	1	2	3	4	Yes	Yes	Yes	Yes	Yes	I don't know	I don't know	I don't know
16/11	Yes	Yes	No	No	No	No	No	No	No	No	No		2	1	3	4	2	1		1	1	2	1	2	2	1	1	1	1	1	1	1	1	1	1	3	2	2	3	4	5	Yes	Yes	Yes	Yes	I don't know	No	Yes	Yes
16/11	No	No	No	No	No	No	Yes	No	No	Yes	Yes	progetti nei parchi pubblici di intrattenimento a contatto con la natura	1	1	1	3	1	1		1	1	1	1	1	1	1	2	3	2	2	1	2	1	3	2	4	1	1	3	3	4	Yes	Yes	Yes	Yes	No	No	No	No
16/11	No	No	Yes	No	No	Yes	Yes	No	No	No	Yes	parchi, giardini pubblici, spartitraffico alberato	2	1	2	5	1	1		3	2	2	1	5	5	1	1	1	1	1	2	1	5	1	1	4	1	1	1	1	1	Yes	Yes	I don't know	Yes	I don't know	No	Yes	I don't know
16/11	No	No	No	No	No	No	No	No	No	Yes	No		1	1	2	3	1	2		1	1	2	1	1	1	2	3	2	1	1	1	1	1	2	2	4	1	1	1	1	3	Yes	Yes	Yes	Yes	Yes	Yes	Yes	Yes
16-11						Yes	Yes			Yes	No		1	1	1	3	1	1		3	1	1	1	1	2	2	1	2	3	2	1	2	1	1	1	1	1	1	1	2	5	Yes	Yes	Yes	Yes			Yes	Yes
16/11	Yes	No	No	No	No	No	Yes	No	No	No	Yes		1	1	1	5	1	1		1	1	1	1	1	1	1	1	2	2	2	2	2	1	2	2	4	2	2	3	3	4	Yes	Yes	Yes	Yes	No	No	No	No
16-11							Yes				No	agricoltura in città	1	1	1	3	1	2		4	1	1	1	1	1	1	1	1	1	1	1	1	1	2	1	5	1	1	3	4	5
16-11										Yes	No		2	2	1	5	1	1		5	1	1	1	1	1	2	2	2	4	2	1	3	1	1	1	5	1	1	1	1	5	Yes		Yes	Yes				Yes
16/11	No	No	No	No	No	No	No	No	No	No	No		1	2	3	5	4	4		2	2	3	3	3	4	3	4	4	4	4	4	4	2	3	3	4	2	2	2	2	2	Yes	Yes	Yes	Yes	Yes	Yes	Yes	Yes
16-11											Yes		1	1	1	3	1	1		2	1	1	1	1	1	1	1	1	1	1	1	1	1	2	2	4	1	1	3	3	5	Yes			Yes
16-11						Yes				Yes	No		1	1	1	2	1	1		3	1	1	1	1	1	1	1	1	1	1	1	1	1	1	1	5	1	1	2	4	5			Yes	Yes				Yes
16-11							Yes				Yes		2	2	1	5	1	1		3	2	2	1	1	1	1	1	1	4	1	1	1	1	2	1	4	1	1	2	3	5			Yes
16/11	No	No	No	No	No	No	No	No	No	Yes	No		1	1	1	3	2	2		2	3	2	2	1	1	2	3	3	2	2	3	2	1	1	1	3	2	2	3	3	3	I don't know	I don't know	I don't know	Yes	I don't know	No	Yes	No
16-11						Yes	Yes				Yes		1	1	1	2	1	1		1	1	1	1	1	1	1	1	1	1	1	1	1	1	1	1	1	1	1	1	5	5	Yes	Yes	Yes	Yes			Yes	Yes
16/11	No	No	Yes	Yes	No	No	No	No	No	No	Yes		1	1	1	3	1	1		2	1	1	1	1	4	4	4	4	4	4	2	4	1	3	3	5	2	1	1	1	1	Yes	Yes	Yes	Yes	Yes	No	No	No
16-11						Yes	Yes			Yes	No		1	1	1	1	1	1		1	1	1	1	1	1	1	1	1	1	1	1	1	1	1	1	5	1	1	5	5	5
16-11							Yes			Yes	Yes		1	1	1	3	1	1		4	1	1	1	1	1	1	1	1	5	1	1	1	1	1	1	4	1	1	1	1	5	Yes
16/11	No	No	No	Yes	No	Yes	Yes	No	No	No	Yes	creare spazi verdi in città	2	2	1	4	1	1		2	2	2	2	2	2	2	2	1	4	4	2	3	1	1	1	3	1	1	1	2	2	Yes	I don't know	Yes	Yes	I don't know	No	No	No
16-11						Yes					No		2	2	2	5	1	1		1	1	1	1	1	1	1	1	1	1	1	1	1	1	1	1	5	1	1	1	1	5
16/11	No	No	No	No	No	No	No	No	No	No	No		1	1	5	3	3	2		2	4	4	4	4	4	4	4	4	4	4	4	4	3	4	4	5	3	3	2	2	2	Yes	No	Yes	Yes	Yes	Yes	Yes	Yes
16-11											Yes		1	1	1	2	1	1		1	1	1	1	1	1	1	1	1	1	1	1	1	1	1	1	4	1	1	1	1	5	Yes	Yes	Yes	Yes			Yes	Yes
16-11						Yes	Yes			Yes	No		2	2	1	5	1	1		5	1	1	1	1	1	2	2	2	5	2	1	1	1	1	1	4	1	1	3	3	5
16/11	Yes	Yes	No	No	No	Yes	Yes	No	No	Yes	Yes	insegnare ai bambini a coltivare	1	1	1	3	1	1		2	1	1	1	1	1	1	1	1	1	1	1	1	1	2	2	3	1	1	1	1	3	I don't know	Yes	I don't know	Yes	I don't know	I don't know	I don't know	I don't know
17/11	Yes	Yes	No	No	No	Yes	No	No	No	No	Yes	zone verdi in città	1	1	1	3	1	1		1	1	1	2	1	1	2	1	2	3	3	3	3	1	2	2	4	1	1	1	2	3	Yes	Yes	I don't know	Yes	I don't know	No	No	No
17/11	Yes	No	No	Yes	Yes	Yes	No	No	No	Yes	No		1	2	2	3	2	1		1	2	2	2	1	1	2	2	2	2	2	1	2	1	2	2	3	2	1	1	1	3	Yes	Yes	No	No	I don't know	Yes	I don't know	No
17-11										Yes	No		1	1	1	2	1	1		3	1	1	1	1	1	1	1	1	1	1	1	1	1	1	1	5	1	1	5	5	5	Yes
17/11	Yes	No	No	No	No	No	No	No	No	Yes	No		1	2	3	4	3	2		3	2	2	2	2	3	1	2	2	3	3	1	2	1	1	2	3	1	1	2	2	4	Yes	Yes	Yes	Yes	Yes	No	I don't know	I don't know
17-11	Yes									Yes	No		1	1	1	1	1	1		1	1	1	1	1	1	1	1	1	1	1	1	1	1	1	1	3	1	1	1	2	5
17/11	No	No	No	No	No	Yes	No	No	No	No	Yes	Varie attività per il giardinaggio e là coltivazione	1	2	2	4	1	1		1	2	2	2	1	1	2	2	1	1	1	1	1	1	1	1	5	1	1	2	3	4	Yes	I don't know	Yes	Yes	I don't know	I don't know	I don't know	I don't know
17-11	Yes					No	Yes			Yes	Yes		1	1	2	5	1	1		4	1	1	1	1	3	1	2	2	4	2	1	1	1	1	1	1	1	1	1	2	4	Yes	Yes	Yes	Yes				Yes
17-11										Yes	No		1	1	1	4	1	1		2	1	1	1	1	1	1	1	1	1	1	1	1	1	2	1	5	1	1	4	5	5	Yes	Yes
17/11	No	No	No	No	No	Yes	Yes	No	No	No	Yes	affittare ori urbani e coltivare	1	1	2	3	1	1		1	1	2	2	1	3	1	1	1	1	1		1	1	3	3	5	1	1	1	2	3	Yes	Yes	Yes	Yes	Yes	I don't know	Yes	Yes
17/11	No	No	No	No	No	Yes	Yes	No	No	No	No		1	2	2	5	2	1		3	1	1	1	1	1	1	3	3	3	3	2	2	1	2	2	3	1	1	2	2	3	Yes	Yes	Yes	Yes	No	No	No	No
17-11							Yes			Yes	Yes		1	1	1	2	1	1		3	1	1	1	1	1	1	1	1	3	1	1	1	1	1	1	3	1	1	1	5	5	Yes	Yes	Yes	Yes			Yes	Yes
17/11	No	No	No	No	No	Yes	No	No	No	Yes	No		1	1	2	4	2	2		2	1	1	1	1	1	1	1	1	1	1	1	1	1	2	2	3	1	1	2	2	4	I don't know	I don't know	I don't know	Yes	I don't know	I don't know	I don't know	I don't know
17-11	Yes						Yes			Yes	Yes		2	1	1	5	1	1		4	1	1	1	1	1	1	1	1	4	1	1	1	1	2	2	5	1	1	3	5	5
17/11	Yes	No	No	No	No	Yes	Yes	No	No		Yes	programmi educativi per bambini nelle scuole	1	1	1	5	1	1		1	1	1	1	1	1	1	1	1	1	1	1	1	1	2	2	5	1	1	2	3	3	Yes	Yes	No	Yes	I don't know	No	I don't know	I don't know
17-11							Yes				Yes		1	2	1	4	1	1		3	2	1	1	2	1	1	2	2	1	1	1	1	1	1	1	5	1	1	1	5	5
17/11	No	Yes	No	No	No	No	Yes	No	No	Yes	Yes		1	1	1	4	1	1		1	1	1	2	1	3	2	2	2	2	1	1	1	1	2	2	4	2	1	1	1	1	Yes	No	No	Yes	No	No	No	No
17-11	Yes					Yes	Yes			Yes	No		2	1	1	3	1	1		3	1	1	1	1	1	1	1	2	3	1	1	2	1	2	1	3	1	1	1	1	5
17/11	No	No	No	No	No	Yes	Yes	No	No	No	Yes	orti comunali per anziani	1	1	1	-99	1	1		3	1	1	1	1	1	1	3	3	3	3	2	2	1	1	1	5	1	1	1	2	3	Yes	Yes	Yes	Yes	No	No	No	No
17/11	Yes	Yes	No	No	Yes	Yes	Yes	No	No	Yes	No		1	1	1	3	1	1		2	1	1	1	1	1	1	1	1	1	1	1	1	1	2	2	4	1	1	1	1	3	I don't know	I don't know	I don't know	Yes	I don't know	I don't know	I don't know	I don't know
17-11	Yes						Yes			Yes	Yes		1	1	1	3	1	1		1	1	1	1	1	1	1	1	1	1	1	1	1	1	1	1	5	1	1	1	1	5
17/11	No	No	No	No	No	Yes	Yes	No	No	No	No		1	1	2	3	1	1		3	2	2	2	2	2	2	2	1	2	1	2	2	2	1	1	4	1	1	1	1	3	Yes	I don't know	I don't know	Yes	No	No	No	No
17/11	Yes	Yes	Yes	Yes	Yes	Yes	Yes	Yes	Yes	Yes	No		1	1	1	5	1	1		1	1	1	1	1	1	1	1	1	1	1	1	1	1	1	1	2	1	1	1	1	1	Yes	No	No	Yes	No	No	No	No
17-11										Yes	Yes	piccoli orti in giardini privati dentro la città	1	2	2	3	1	3		3	1	1	3	3	3	2	1	1	1	1	1	3	1	1	1	2	1	1	2	2	3		Yes			Yes
17-11							Yes			Yes	No		1	2	1	3	1	1		1	1	1	1	1	2	2	1	1	1	1	1	2	1	1	1	3	1	1	1	2	3	Yes
17-11										Yes	Yes		1	1	1	4	1	1		3	1	1	1	1	1	1	1	1	2	1	1	1	1	1	2	4	1	1	2	2	4	Yes			No
17-11											No		2	1	1	1	1	1		1	1	1	1	3	2	2	1	1	3	1	1	1	1	1	2	3	1	1	2	4	5	Yes			Yes
17-11						Yes	Yes			Yes	No		1	2	2	4	1	1		1	1	1	1	1	1	1	1	1	1	1	1	1	1	1	1	2	1	1	1	1	2	Yes	Yes	Yes	Yes	Yes			Yes
18/11	Yes	No	No	No	No	Yes	No	No	No	No	Yes	Coltivare n città	2	2	3	5	1	1		1	2	2	1	2	2	2	1	1	1	2	1	1	1	2	2	4	1	1	1	1	2	Yes	Yes	Yes	Yes	I don't know	I don't know	Yes	Yes
18/11	No	Yes	No	No	No	Yes	No	No	No	No	No		1	2	3	5	1	1		1	2	1	1	1	2	1	2	3	3	3	2	2	1	2	1	5	1	1	3	3	4	Yes	Yes	Yes	Yes	Yes	Yes	Yes	Yes
18-11							Yes			Yes	No		1	1	1	3	1	1		3	1	1	1	1	1	1	1	1	1	1	1	1	1	1	1	3	1	1	1	1	3	Yes		Yes	Yes
18-11						Yes	Yes			Yes	Yes		1	1	1	5	1	1		3	1	1	1	1	1	1	1	1	3	1	1	1	1	1	1	2	1	1	3	4	5		Yes
18/11	Yes	No	No	No	No	Yes	Yes	No	No	Yes	Yes	Attività in città dove si lavora la terra	2	2	1	5	1	1		3	2	1	1	1	3	1	1	3	3	3	2	2	1	1	1	5	1	1	2	2	4	Yes	I don't know	I don't know	Yes	I don't know	No	No	No
18-11							Yes		Yes	Yes	No		1	1	1	4	1	1		3	1	2	1	2	2	1	1	1	4	1	1	2	1	1	1	4	1	1	1	1	3
18-11										Yes	No		1	1	1	2	1	1		2	1	1	1	1	1	1	1	1	1	1	1	1	1	1	2	2	1	1	2	2	3		Yes
18/11	No	No	No	No	No	No	Yes	No	No	Yes	Yes	Attività inerenti all'agricoltura in città	1	1	1	-99	1	1		3	1	3	2	1	3	2	2	4	4	4	1	2	1	1	1	4	1	1	1	1	4	Yes	Yes	Yes	Yes	Yes	No	Yes	I don't know
18-11							Yes				Yes	agricoltura praticata in centri urbani o nelle vicinanze	1	1	1	4	1	1		3	1	1	1	1	2	1	1	1	3	1	1	1	1	1	2	4	1	1	4	5	5	Yes	Yes	Yes
18/11	No	No	No	No	No	No	Yes	No	No	Yes	No		1	1	1	3	1	1		2	1	1	1	1	1	2	1	1	1	1	1	1	1	1	1	3	1	1	2	2	3	I don't know	I don't know	I don't know	Yes	I don't know	No	I don't know	I don't know
18-11				Yes		Yes				Yes	No		1	1	1	1	1	1		1	1	1	1	1	1	1	1	1	1	1	1	1	1	1	4	5	1	1	1	1	2
18/11	No	No	No	No	No	Yes	No	No	No	Yes	No		1	1	2	3	1	1		1	2	1	2	3	2	1	2	2	2	1	3	2	2	1	2	2	3	1	1	2	3	Yes	Yes	No	Yes	No	No	Yes	I don't know
18-11						Yes	Yes			Yes	Yes		1	1	1	3	1	1		2	1	1	1	1	2	2	1	1	3	1	1	1	1	1	1	4	1	1	1	4	5		Yes
18/11	No	No	No	No	No	No	No	No	No	No	No		1	3	1	5	2	1		3	2	1	2	1	1	2	2	2	2	2	2	2	1	2	2	4	2	2	1	1	3	Yes	Yes	I don't know	Yes	I don't know	No	No	No
2/11	No	No	No	No	No	Yes	Yes	No	No	Yes	No		1	1	1	1	1	1		2	1	1	1	1	1	-99	2	2	1	1	1	1	1	1	3	5	1	1	2	5	5		Yes
2/11	No	No	No	No	No	No	Yes	No	No	Yes	Yes		1	1	1	1	1	1		1	1	1	2	2	2	2	1	1	1	1	1	2	2	1	1	1	1	1	1	4	4
2/11	No	No	No	No	No	No	No	No	No	No	No		1	2	2	2	1	1		2	2	1	1	1	1	1	1	1	1	1	1	1	1	1	1	5	1	1	5	5	5
2/11	No	No	No	No	No	No	Yes	No	No	Yes	No		1	1	1	1	1	1		1	1	1	1	1	1	1	1	1	1	1	1	1	1	2	2	2	1	1	1	5	5
2/11	No	No	No	No	No	No	Yes	No	No	No	Yes		1	1	1	1	1	1		1	1	1	1	1	1	1	1	1	1	1	1	1	1	2	2	2	1	1	1	3	3
2/11	No	No	No	No	No	Yes	Yes	No	No	No	No		1	1	1	1	1	1		1	1	1	1	1	1	1	1	1	1	1	1	1	1	1	1	1	1	1	1	1	1
2/11	No	No	No	No	No	Yes	No	No	No	No	No		1	1	1	1	2	2		1	1	1	1	2	2	2	2	1	1	1	1	1	1	1	1	2	1	1	1	1	1
2/11	No	No	No	No	No	No	Yes	No	No	No	No		1	1	2	2	2	1		1	1	1	1	1	1	1	1	1	1	1	1	1	1	1	1	4	1	1	1	5	5	Yes
2/11	No	No	No	No	No	Yes	Yes	No	No	No	No		1	1	1	1	1	1		1	1	1	1	1	1	1	1	1	1	1	1	1	1	1	3	4	1	1	3	3	5
2/11	No	No	No	No	Yes	Yes	Yes	No	No	No	No		1	1	1	1	2	1		1	2	2	1	1	1	1	1	1	1	1	1	2	2	1	4	5	1	1	2	5	5
2/11	No	No	No	No	No	Yes	Yes	No	No	No	Yes		1	1	1	2	2	1	2	2	2	2	1	1	1	1	1	1	1	1	1	1	1	1	1	2	1	1	1	1	5
2/11	No	No	No	No	No	Yes	No	No	No	No	No		1	2	2	1	1	1		1	1	1	2	1	1	1	2	2	1	1	2	1	1	1	1	4	1	1	1	2	5
2/11	No	No	No	No	No	Yes	Yes	No	No	No	No		1	1	2	2	2	1		1	1	1	1	2	2	2	1	1	1	1	1	1	1	1	1	4	1	1	1	5	5
29/10	No	No	No	No	No	No	Yes	No	No	No	No		1	1	2	2	1	2		1	1	2	2	1	1	1	2	2	2	1	1	2	2	1	1	1	1	1	3	3	5
29/10	No	No	No	No	No	No	No	No	No	No	No		1	2	2	2	1	1		1	1	2	1	1	1	1	1	1	1	1	1	1	1	1	1	5	1	1	4	4	4
29/10	No	No	No	No	No	Yes	No	No	No	No	No			1	1	1	1	1		1	1	2	1	2	2	1	1	1	1	1	1	1	1	1	1	1	1	1	1	1	1
29/10	No	No	No	No	No	Yes	Yes	No	No	Yes	Yes	Coltivare in città	1	1	1	1	1	1		1	2	2	1	2	2	1	1	1	1	1	1	2	1	1	3	5	1	1	2	5	5
29/10	No	No	No	No	No	No	No	No	Yes	Yes	No		4	5	4	5	3	4		3	4	5	4	3	4	5	5	4	5	5	4	3	4	2	2	3	3	2	2	2	3
29/10	Yes	No	No	No	No	No	No	No	No	Yes	No		1	1	1	1	1	1		1	1	1	1	1	1	1	1	1	1	1	1		1	1	1	3	1	1	4	5	5	Yes	Yes	Yes
29/10	No	No	No	No	No	Yes	Yes	No	No	No	No		1	1	1		2	1		1	1	2	2	1	4	4	5	5	1	4	4	5	5	2	2	4	1	2	2	3	3
29/10	No	No	No	No	No	No	Yes	No	No	No	No	Un tipo di agrico Laura sviluppata in città	2	2	3	4	2	2		2	2	2	-99	5	5	5	-99	5	5	4	-99	-99	3	2	3	4	2	2	3	4	4	Yes	Yes		Yes			Yes	Yes
29/10	No	No	No	No	No	No	Yes	No	No	Yes	Yes	Possibilità di coltivare un pezzo si terrà concesso dal comune in zone riqualificate all'interno della città	1	1	1	5	1	1		1	1	1	1	2	1	5	1	1	1	1	1	1	1	1	1	5	1	1	3	2	5	Yes
29/10	No	No	No	No	No	No	Yes	No	No	No	Yes	Favorisce la possibilità di coltivare in area urbana	1	2	2	3	2	2		1	2	2	1	2	2	2	2	2	2	2	2	2	2	3	2	4	2	1	2	2	3		Yes
29/10	No	No	No	No	No	No	Yes	No	No	Yes	No	Spazi di agricoltura in città	1	2	1	4	1	1		2	1	2	1	2	2	3	2	2	3	2	3	3	3	1	2	3	1	1	2	2	3		Yes	Yes	Yes	Yes		Yes	Yes
29/10	No	No	No	No	No	Yes	No	No	No	Yes	Yes	Modo per avvicinare i cittadini alla natura	1	1	1	5	1	1		5	1	1	2	1	1	1	1	1	1	1	1	1	1	2	2	3	1	1	3	4	4	Yes	Yes	Yes	Yes			Yes
24/10	No	No	No	No	No	Yes	No	No	No	Yes	Yes	Piccole coltivazioni per autoconsumo	1	1	2	3	1	2		3	2	1	1	1	2	3	2	1	2	3	2	2	3	2	3	2	3	3	3	3	2
24/10	No	Yes	Yes	No	No	No	No	No	No	No	No		2	1	1	5	2	1		1	1	1	1	2	1	1	1	1	2	2	3	3	3	1	1	4	2	2	4	5	5		Yes
24/10	No	Yes	No	No	Yes	No	No	No		No	No		2	2	3	5	5	4		3	2	2	2	2	2	1	1	2	2	1	1	1	1	1	1	5	3	3	3	4	5
24/10	No	No	No	Yes	No	Yes	No	No	No	Yes	Yes	Agricoltura in centro	1	3	2	5	1	1		2	1	1	2	3	3	-99	1	1	-99	3	5	-99	2	1	1	5	1	1	2	4	3	Yes	Yes	Yes					Yes
24/10	No	No	No	No	No	Yes	Yes	No	No	No	Yes	Produrr frutta e verdura fresca n città	1	1	1	5	1	1		5	1	1	1	1	1	1	1	1	1	1	2	2	1	1	1	3	1	1	3	3	3		Yes	Yes				Yes
24/10	No	No	No	Yes	No	Yes	Yes	No	No	No	Yes	Essere autosufficienti e recuperare il più possibile	2	1	4	5	4	3		2	2	1	4	2	1	4	1	5	-99	-99	-99	3	4	2	1	5	1	2	3	3	5	Yes
24/10	No	No	No	No	No	Yes	No	No	No	Yes	No		2	2	1	-99	1	1		2	1	1	1	1	5	5	1	5	5	5	5	5	2	2	2	4	2	2	1	1	2	Yes	Yes	Yes	Yes	Yes	Yes	Yes	Yes
24/10	No	No	No	No	No	Yes	No	No	No	Yes	Yes	Produrre per autoconsumo in modo naturale	1	2	4	5	5	2		1	2	4	4	1	1	2	2	1	4	1	5	-99	5	2	4	5	1	1	5	5	5
24/10	No	No	No	No	Yes	No	No	No	No	No	Yes	Agricoltura in città	1	1	1	5	1	1		1	1	1	3	1	1	3	3	1	1	1	1	1	3	1	1	5	1	1	1	5	5	Yes	Yes	Yes	Yes	Yes	Yes	Yes	Yes
24/10	No	No	No	No	Yes	Yes	Yes	No	No	Yes	No		1	1	1	5	1	1		1	1	1	1	1	2	2	1	1	1	1	1	1	1	1	1	5	1	1	2	2	4	Yes	Yes	Yes	Yes	Yes	Yes	Yes	Yes
24/10				Yes	Yes				Yes	Yes	No	Mangiare ortaggi sani prodotti nei parchi	1	1	2	4	2	4		1	2	1	4	2	1	2	1	2	1		5	3	2	1	2	4	1	2	1	1	1
24/10	No	No	No	No	No	No	Yes	No	No	Yes	No	Agricoltura in città	4	1	1	3	2	1		5	1	1	1	3	4	1	1	1	1	1	1	1	1	1	3	3	1	1	2	4	1			Yes	Yes	I don't know
24/10	No	No	No	No	No	Yes	No	No	No	No	Yes	Iniziative sul'agricoltura in città	1	1	1	4	1	1		1	1	1	1	1	1	1	1	1	1	1	1	1	1	1	4	4	1	1	3	5	5	Yes	Yes	Yes	Yes	Yes		Yes	Yes
24/10	No	No	No	No	No	Yes	No	No	No	Yes	Yes	Orti in città aperti a tutti	1	1	1	5	2	2	5	5	1	1	1	1	1	1	1	1	1	1	1	1	1	2	2	5	1	1	5	5	5	Yes	Yes	Yes
24/10					Yes				Yes	Yes	No		1	1	1	5	1	1		4	1	1	1	1	1	1	1	5	5	5	1	1	1	1	2	5	1	1	1	1	4		Yes	Yes
24/10					Yes	Yes	Yes				Yes	Coltivare l'ortoin comunita	1	1	1	4	2	1		3	2	3	5	1	2	-99	1	3	5	-99	-99	5	-99	3	4	5	1	1	3	3	5
24/10	No	No	No	No	No	Yes	No	No	No	No	No		2	2	2	5	2	2		4	3	3	3	2	2	2	2	1	1	1	2	2	2	2	2	4	1	1	4	4	5			Yes	Yes	Yes	Yes	Yes	Yes
24/10	No	Yes	No	No	No	Yes	Yes	No	Yes	No	Yes		1	2	1	1	1	2		3	1	1	1	1	1	2	1	1	2	1	1	1	1	1	1	5	1	1	1	1	5	Yes	Yes	Yes	Yes	Yes	Yes	Yes	Yes
24/10	No	No	No	No	Yes	No	No	No	No	Yes	No	Colts are Erne aromatic he in terrazzo	1	2	4	3	2	1		1	2	1	1	1	2	1	2	2	1	1	1	1	1	1	1	4	1	2	3	3	5
24/10	No	No	No	No	No	No	Yes	No	No	No	Yes	Initiative legate all'agricoltura	1	1	1	4		1			2	1	1	2	1	1	2	2	2	2	3	3	3	1	1	5	1	1	1	2	5		Yes	Yes	Yes			Yes
24/10	No	Yes	No	Yes	No	No	No	No	No	No	Yes	Colts are l'ortoin Sui tetti	1	2	3	5	2	1		1	1	1	2	1	2	1	2	1	1	1	5	4	4	1	2	2	2	1	1	1	2		Yes		Yes	Yes	Yes	Yes	Yes
24/10	Yes	No	No	No	No	No	Yes	No	No	No	No		1	1	1	4	1	1		1	1	1	1	1	1	1	1	1	1	1	1	1	1	1	1	3	1	1	3	3	4	Yes	Yes	Yes				Yes
24/10	No	Yes	No	No	No	Yes	No	No	No	No	Yes	Procure in citta	1	1	1	2	1	1		2	2	2	1	1	1	2	2	2	1	1	1	1	2	1	1	3	1	1	4	4	5	Yes	Yes	Yes
24/10	No	No	No	No	Yes	No	No	No	No		Yes	Coltiva in città a scopri didattico	2	2	2	1	1	1		1	1	1	2	2	2	1	1	1	2	1	2	1	1	1	1	2	1	1	1	3	5	Yes	Yes					Yes
24/10	No	No	No	No	No	Yes	No	No	No	Yes	Yes		1	1	1	-99	1	1	4	2	1	3	1	1	3	1	1	1	1	1	1	1	1	1	1	3	1	1	4	5	5		Yes	Yes	Yes	Yes	No	Yes	No
24/10	No	Yes	No	No	Yes	Yes	No	No	No	No	Yes	Tutto Ciò Chen viene prodotto in città	1	2	2	5	2	3		5	2	2	1	2	1	2	2	1	1	1	2	1	1	1	1	5	1	1	1	5	5							Yes
24/10	No	No	No	No	No	Yes	No	No	No	Yes	Yes		1	1	1	-99	1	1	4	2	1	3	1	1	3	1	1	1	1	1	1	1	1	1	1	3	1	1	4	5	5		Yes	Yes	Yes	Yes	No	Yes	No
27/10	No	Yes	No	No	No	Yes	No	No	No	No	No		2	2	2	2	2	2		2	2	2	2	2	2	2	2	2	2	2	2	2	2	2	2	2	2	2	5	5	5	Yes	Yes	Yes
27/10	No	Yes	No	No	No	No	No	No	No	No	Yes	Progestin agricoli	1	1	1	1	1	1		2	1	1	2	1	1	2	1	1	2	2	3	3	3	2	2	4	2	2	5	5	5	Yes	Yes	Yes
27/10	No	Yes	No	No	No	No		No	No	No	No		2	2	2	1	1	1		3	3	3	2	2	2	2	3	3	3	2	1	1	1	1	1	1	1	1	1	5	5
27/10	No	No	No	No	No	Yes	No	No	No	No	Yes	Zone dedicate al quarters per sensibilizzare I citta ding sull'agricoltura	1	1	1	2	2	3		2	2	2	1	2	2	3	2	2	1	1	1	1	1	5	5	5	3	3	3	3	5				Yes	Yes		Yes
27/10	No	Yes	No	No	No	Yes	No	No	No	No	Yes		1	1	1	5	1	1		4	1	1	3	1	1	3	1	1	1	1	1	1	1	1	1	3	1	1	4	4	5		Yes	Yes	Yes	Yes	Yes	Yes	Yes
27/10	Yes	No	No	No	No	No	No	No	No	No	Yes	Livorno nei campi	1	4	2	5	5	2		2	5	5	5	2	5	3	2	1	5	1	1	1	1	1	1	5	1	1	1	1	2
27/10	No	No	No	No	Yes	No	Yes	No	No	No	Yes		1	1	1	1	1	1		1	1	1	1	1	1	1	1	1	1	1	1	1	1	1	1	3	1	2	3	4	4	Yes	Yes	Yes	Yes	Yes	Yes	Yes	Yes
27/10	No	No	No	No	No	No	Yes	No	No	Yes	Yes	Coltivare in Vaso	1	1	2	2	1	1		1	1	2	2	1	1	2	2	2	3	3	3	1	3	1	1	5	1	1	1	5	5	Yes	Yes	Yes	Yes			Yes	Yes
27/10	Yes	No	No	No	No	No	Yes	No	No	No	Yes	Modo per avvicinarsi alla natura	1	1	1	1	1	1		4	1	1	1	1	1	2	1	1	5	5	1	1	1	1	1	1	1	1	2	2	3	Yes	Yes	Yes	Yes			Yes	Yes
27/10	No	No	No	No	No	No	Yes	No	No	No	No		1	1	1	5	1	1		5	1	1	1	1	1	1	1	1	1	1	1	1	1	1	1	5	1	1	1	5	5	Yes	Yes	Yes	Yes	Yes		Yes	Yes
27/10	No	No	No	No	Yes	No	No	No	No	Yes	Yes	Zone dove puoi coltivare in città	1	1	1	5	1	1		5	1	1	1	1	1	1	1	1	1	1	1	1	1	1	1	1	1	1	5	5	5	Yes	Yes	Yes	Yes				Yes
27/10	No	No	No	No	No	No	Yes	No	No	No	No		1	1	1	2	2	1		1	1	2	2	2	2	2	2	1	1	1	1	1	1	1	1	3	1	1	4	4	4	Yes	Yes	Yes	Yes	Yes	Yes	Yes	Yes
12-11											No		1	1	1	5	2	1		5	1	2	2	2	1	1	2	1	1	2	2	1	1	1	1	5	1	1	4	5	5	Yes	Yes	Yes	Yes
27/10	No	Yes	No	Yes	No	No	Yes	No	No	Yes	No		1	1	3	3	3	3		1	1	1	1	2	3	-99	-99	-99	-99	5	1	1	1	1	1	5	1	1	1	4	4	Yes	Yes	Yes	Yes			Yes	Yes
10-11	Yes										Yes		1	1	1	4	1	1		5	1	1	1	1	1	1	1	2	1	1	1	1	1	1	1	4	1	1	2		5	Yes	Yes	Yes	Yes	No	No	No	Yes
27/10	No	No	No	No	No	No	Yes	No	No	Yes	Yes		1	2	1	2	2	1		1	1	1	2	2	1	1	1	2	2	2	1	1	1	1	1	5	1	1	1	4	4	Yes	Yes	Yes	Yes	Yes
10-11							Yes				No		1	1	1	2	1	1		3	2	2	1	1	1	1	1	2	2	3	1	1	1	1	1	5	1	1	4	5	5
10-11	Yes		Yes				Yes			Yes	Yes		1	1	1	3	1	1		4	1	1	1	1	2	2	1	1	2	1	1	1	1	1	1	4	1	1	4	5	5	Yes	Yes	Yes	Yes	Yes			Yes
27/10	No	No	No	No	No	No	No	No	No	Yes	No		1	1	2	1	1	1		2	2	1	1	1	2	1	1	1	2	2	1	1	1	1	1	5	1	1	1	5	5	Yes	Yes	Yes	Yes	Yes			Yes
10-11							Yes			Yes	No		1	1	1	1	1	1		4	1	1	1	1		1	1	3	3	3	1	1	1	1	1	5	1	1	4	5	4	Yes	Yes	Yes	Yes			Yes	Yes
10-11					Yes		Yes			Yes	No		1	1	1	5	1	1		5	1	2	2	1	1	2	1	1	1	2	2	2	1	1	1	5	1	1	4	5	5	Yes	Yes	Yes	Yes
27/10	No	No	No	Yes	No	Yes	No	No	No	Yes	No		1	1	1	2	2	1		1	2	1	2	2	2	1	1	1	1	2	2	1	4	1	1	5	1	1	1	5	5	Yes	Yes	Yes	Yes	Yes	Yes	Yes	Yes
10-11	Yes					Yes	Yes		Yes	Yes	No		1	1	1	5	1	1		5	1	1	1	1	2	2	1	2	2	2	1	1	2	1	1	5	1	1	4	5	5	Yes	Yes	Yes	Yes				Yes
10-11	Yes		Yes			Yes				Yes	No		1	1	1	4	1	1		5	1	1	1	2	2	1	1	1	2	1	1	1	2	1	1	5	1	1	3	5	5	Yes	Yes	Yes	Yes	Yes	Yes	Yes	Yes
27/10	No	No	No	No	No	Yes	Yes	No	No	Yes	No		1	1	1	4	1	1		5	1	1	1	1	2	-99	1	1	5	1	-99	-99	1	1	1	4	1	1	1	1	5	Yes	Yes	Yes	Yes				Yes
10-11										Yes	Yes		1	1	1	5	1	1		5	1	1	1	2	2	1	1	1	2	1	1	1	1	1	1	4	1	1	4	5	5
10-11									Yes	Yes	Yes		1	1	1	5	2	2		1	2	2	1	1	1	2	1	1	2	1	1	1	2	1	1	5	1	1	5	5	5	Yes	Yes	Yes	Yes	Yes	Yes	Yes	Yes
27/10	No	No	No	No	No	No	Yes	No	No	No	Yes	Avvicinamento alla natura per tutti	1	1	1	1	1	1		2	2	1	1	1	1	3	1	1	-99	-99		1	2	1	1	4	1	1	2	2	2	Yes	Yes	Yes	Yes	Yes			Yes
10-11			Yes			Yes				Yes	Yes		1	1	1	4	1	1		5	1	1	1	1	1	1	2	2	2	2	1	1	2	1	1	3	1	1	1	3	3	Yes	Yes	Yes	Yes				Yes
10-11		Yes						Yes		Yes	No		1	1	1	4	1	1		2	1	2	2	1	1	2	1	1	1	2	2	2	1	1	1	4	1	1	2	4	5	Yes	Yes	Yes	Yes			Yes	Yes
27/10	No	No	No	No	No	Yes	Yes	No	No	No	No		1	2	1	1	2	2		1	2	2	1	1	1	2	2	3	-99	-99	-99	1	1	1	1	4	1	1	1	3	4	Yes	Yes	Yes	Yes	Yes	Yes	Yes	Yes
10-11					Yes	Yes	Yes				Yes		1	1	1	4	1	1		5	1	1	1	1	2	2	1	1	2	2	1	1	2	1	1	5	1	1	4	5	5
27/10	No	No	No	No	No	Yes	Yes	No	No	Yes	No		1	1	2	2	2	1		2	2	3	3	1	1	3	1	2	2	1	1	1	1	1	1	5	1	1	1	1	5	Yes	Yes	Yes	Yes	Yes
10-11						Yes				Yes	No		1	1	1	5	1	1		5	1	1	1	1	1	1	1	1	4	4	1	2	1	1	1	2	1	1	4	5	5	Yes	Yes	Yes	Yes			Yes	Yes
3-11	Yes									Yes	No		1	1	1	5	1	1		1	1	1	1	1	1	1	1	1	1	1	1	1	1	1	1	5	1	1	1	5	5	Yes	Yes	Yes	Yes	Yes		Yes	Yes
27/10	No	No	No	No	No	Yes	No	No	No	Yes	No	Orti in città	1	3	2	5	3	2		3	3	4	2	1	5	1	2	2	1	1	2	1	2	2	3	1	2	2	4	2	5	Yes	No	No	Yes
3-11										Yes	No		1	1	1	5	1	1		3	1	1	1	1	1	1	1	2	2	2	1	1	1	1	5	5	1	1	5	5	5	Yes	Yes	Yes	Yes	Yes	Yes	Yes	Yes
3-11	Yes								Yes		No		1	1	1	4	1	2		5	1	1	1	1	1	3	3	3	5	3	1	1	1	1	1	4	1	1	3	4	5	Yes	Yes	Yes	Yes			Yes	Yes
27/10				Yes		Yes	Yes			Yes	No	Non penso siano orti in mezzo alla città	1	1	3	4	3	2		3	2	2	2	4	4	4	2	1	1	1	2	1	1	1	2	1	2	4	4	4	4	Yes
3-11	Yes					Yes	Yes			Yes	No		1	1	1	4	1	1		5	1	1	2	2	2	1	2	2	1	1	2	2	2	1	1	2	1	1	1	2	2				Yes
27/10	No	No	No	No	No	Yes	Yes	No	Yes	No	No		1	1	1	5	1	1		-99	1	1	1	1	1	4	-99	1	1	1	3	2	1	2	2	3	1	1	1	1	4
3-11							Yes				Yes		1	1	1	4	1	1		2	2	1	1	2	2	1	1	1	1	1	1	1	1	1	1	2	1	1	1	5	5	Yes	Yes	Yes	Yes
3-11	Yes									Yes	No		1	1	1	1	1	1		1	1	1	1	1	1	1	1	1	1	1	1	1	1	2	2	5	1	1	3	5	5	Yes	Yes	Yes	Yes
3-11	Yes						Yes				No		1	1	1	1	4	1		2	1	1	1	1	1	2	2	2	4	1	1	1	1	5	5	5	1	1	3	5	5	Yes	Yes	Yes				Yes	Yes
27/10	No	No	Yes	No	No	Yes	No	No	No	No	No		1	1	1	5	1	1		1	3	1	1	1	1	1	1	1	1	1	1	1	1	1	1	1	4	4	1	1	3	Yes		Yes	Yes
21/11	Yes	Yes	No	No	No	Yes	Yes	No	Yes	Yes	No		1	2	1	1	1	2		1	1	2	1	1	1	1	1	1	1	1	1	1	1	1	1	3	1	2	2	2	3	Yes	Yes	Yes	Yes	Yes	Yes	Yes	Yes
21/11							Yes			Yes	No		1	1	1	3	1	1		2	1	1	1	1	2	2	1	2	2	2	1	2	1	1	2	4	1	1	3	5	5		Yes			Yes
21/11	No	No	No	No	No	No	No	No	No	No	No		1	1	1	3	1	1		3	1	1	2		2	2	2	1	1	1	2	2	1	2	2	4	1	1	2	2	4	Yes	Yes	Yes	Yes	I don't know	No	I don't know	I don't know
21/11							Yes				No		1	2	2	4	1	1		2	1	1	1	1	1	1	1	1	2	1	1	2	1	1	1	1	1	1	1	2	5	Yes	Yes	Yes	Yes			Yes	Yes
21/11						Yes	Yes			Yes	Yes	Agricoltura alla portata di tutti nella città	1	1	1	1	1	1		2	1	1	1	1	1	2	1	1	3	1	1	1	1	1	2	4	1	1	3	3	5		Yes
21/11										Yes	No		1	1	2	3	1	1		3	1	1	1	1	3	2	2	2	4	2	2	2	1	1	2	5	1	1	3	2	5	Yes	Yes
21/11	No	No	No	No	No	No	Yes	No	No	No	No	Vegetazione della città	1	1	2	4	1	1		4	2	1	1	1	1	1	1	1	1	1	1	1	1	1	1	1	1	1	5	5	5	I don't know	I don't know	I don't know	Yes	I don't know	I don't know	I don't know	I don't know
21/11						Yes	Yes			Yes	No		1	1	1	3	1	1		2	1	1	1	1	1	1	1	1	2	1	1	1	1	1	1	3	1	1	4	4	5
21/11	No	No	No	No	Yes	Yes	No	No	No	Yes	Yes	Coltivare in casa	1	1	2	4	1	1		3	1	1	1	1	1	1	1	1	1	1	1	2	1	2	2	4	1	1	1	2	2	Yes	I don't know	Yes	Yes	I don't know	I don't know	I don't know	I don't know
21/11						Yes				Yes	No		1	1	1	4	1	1		1	1	1	1	1	1	1	1	1	1	1	1	1	1	2	2	4	1	1	3	3	5
21/11						Yes	Yes			Yes	Yes		1	1	2	3	1	1		1	1	1	1	1	1	1	1	1	3	1	1	1	1	1	1	3	1	1	3	4	4
21/11	No	No	Yes	No	No	No	No	Yes	Yes	Yes	No		1	1	2	3	1	1		1	1	2	1	2	2	2	1	1	1	1	1	1	1	2	2	3	2	2	2	3	4	I don't know	Yes	I don't know	Yes	I don't know	No	I don't know	No
21/11	No	No	No	No	No	No	No	No	Yes	No	No		1	1	2	4	2	2		2	2	2	2	1	1	1	1	1	1	1	1	1	1	2	2	3	1	1	2	3	4	Yes	I don't know	Yes	Yes	Yes	No	No	No
21/11		Yes									No	Agricoltura delle terre	1	1	1	1	1	1		1	1	1	1	1	1	4	1	1	4	1	1	1	1	1	1	1	1	1	1	1	1	No	Yes	No	No	Yes	Yes	Yes	Yes
3-11							Yes				Yes		1	1	1	3	1	1		3	1	1	1	1	1	1	1	1	1	2	1	1	2	1	1	1	1	1	1	2	5
3-11						Yes				Yes	Yes		2	2	2	5	2	2		5	2	1	1	2	2	1	1	1	2	2	1	1	1	3	3	3	1	1	3	3	3	Yes	Yes	Yes	Yes			Yes	Yes
3-11						Yes	Yes			Yes	No		1	1	1	4	1	1	1	1	1	1	1	1	1	1	1	2	2	2	1	1	1	2	2	5	1	1	2	5	5	Yes	Yes	Yes	Yes			Yes	Yes
3-11						Yes					No		1	1	1	5	1	1		1	1	1	1	1	1	1	1	2	4	1	1	1	1	4	4	5	1	1	1	1	5
14-11	Yes			Yes							Yes		1	1	1	1	1	1		1	1	1	1	1	1	1	1	1	1	1	1	1	1	1	1	4	1	1	1	3	5	Yes	Yes	Yes	Yes	Yes		Yes	Yes
14-11											Yes		1	1	1	5	1	1		4	1	1	1	1	1	1	1	2	2	5	4	1	1	1	1	4	1	1	2	3	5	Yes	Yes	Yes	Yes	Yes	Yes	Yes	Yes
14-11	Yes			Yes						Yes	No		1	1	1	3	1	1		4	1	1	1	1	1	1	1	1	1	1	1	1	1	1	1	5	1	1	1	4	5
14-11										Yes	Yes		1	1	1	4	1	1		3	1	1	1	1	1	1	2	3	3	3	1	1	1	3	3	5	1	1	2	3	5	Yes	Yes	Yes	Yes	Yes	Yes	Yes	Yes
14-11							Yes			Yes	Yes		1	1	1	3	1	1		4	1	1	1	1	1	1	1	1	5	1	1	1	1	2	2	5	1	1	1	5	5	Yes	Yes	Yes	Yes	No
14-11											No		1	1	1	1	1	1		1	1	1	1	1	1	1	1	1	-99	1	1	1	1	2	2	5	1	1	4	5	5	Yes	Yes	Yes
14-11	Yes										No		1	1	1	5	1	1		4	1	1	1	1	1	1	2	2	5	5	1	1	1	1	1	3	1	1	1	3	5			Yes	Yes	Yes		Yes	Yes
14-11							Yes			Yes	Yes		1	1	1	2	1	1		2	1	1	1	1	1	1	1	1	1	1	1	1	1	1	1	5	1	1	4	5	5
12-11							Yes				No		1	1	1	5	1	2		5	1	2	1	1	1	2	2	2	1	1	1	1	1	1	1	2	1	1	1	1	5	Yes	Yes	Yes	Yes			Yes	Yes
12-11						Yes				Yes	Yes		1	1	1	3	1	1		4	1	1	1	1	1	2	1	1	5	1	1	2	1	1	1	5	1	1	5	5	5	Yes	Yes	Yes	Yes				Yes
21/11	No	No	No	No	No	No	No	No	Yes	No	No		1	1	2	4	2	2		2	2	2	2	1	1	1	1	1	1	1	1	1	1	2	2	3	1	1	2	3	4	Yes	I don't know	Yes	Yes	Yes	No	No	No
22-11							Yes				No		1	2	2	4	2	2		1	1	1	1	1	1	1	1	1	2	1	1	2	1	1	1	2	1	1	3	3	5		Yes	Yes
22-11											Yes		1	1	1	1	1	1		1	1	1	1	1	2	2	1	1	4	1	1	1	1	1	1	1	1	1	1	2	3	Yes	Yes
22/11	No	No	No	No	No	Yes	Yes	No	No	Yes	Yes		1	2	3	4	1	1		3	1	1	2	2	1	1	2	2	1	1	1	1	1	3	3	5	1	1	2	3	4	I don't know	Yes	No	Yes	I don't know	No	I don't know	I don't know
22-11				Yes							No		2	1	2	3	1	2		3	1	1	1	1	3	2	1	1	1	1	1	1	1	1	1	1	1	1	4	4	4
22/11	No	Yes	No	No	No	Yes	Yes	No	No	Yes	No		1	1	1	5	1	1		3	1	1	2	1	1	2	3	3	3	3	1	3	1	1	1	3	1	1	3	3	4	Yes	Yes	Yes	Yes	Yes	No	I don't know	I don't know
22-11	Yes						Yes				No		1	1	1	4	1	2		1	1	1	1	1	1	1	1	1	1	1	1	-99	1	1	1	5	1	1	4	4	5	Yes	Yes
22/11	No	No	No	No	No	No	No	No	No	Yes	Yes	Portare la natura in città	1	5	1	5	1	1		1	1	1	5	1	4	3	3	3	1	1	1	1	1	1	1	3	1	1	1	1	3	Yes	Yes	I don't know	Yes	I don't know	I don't know	I don't know	I don't know
22-11											Yes		1	1	1	1	1	1		1	1	1	1	1	1	1	1	1	1	1	1	1	1	1	1	5	1	1	1	1	5	Yes	Yes
22/11	No	No	Yes	Yes	No	No	No	No	No	No	Yes	Coltivare in piccole zone della città	1	2	3	2	1	1		1	1	1	1	1	1	1	1	1	1	1	1	1	1	1	1	3	1	1	1	2	2	Yes	Yes	Yes	Yes	Yes	Yes	Yes	Yes
22-11						Yes					Yes		1	1	2	4	1	2		3	1	1	1	1	3	3	2	1	4	1	1	1	1	1	1	1	1	1	1	1	3	I don't know	Yes	I don't know	I don't know	I don't know	I don't know	I don't know	I don't know
22/11	Yes	No	No	No	No	Yes	Yes	No	No	Yes	No		2	2	2	-99	1	1		2	1	1	1	1	1	1	1	2	1	1	1	1	1	1	1	3	1	1	2	3	4	I don't know	I don't know	I don't know	I don't know	I don't know	I don't know	I don't know	I don't know
22-11											No		2	2	2	4	1	1		1	2	2	1	1	2	2	2	1	1	1	1	1	1	1	1	1	1	1	1	1	3
22/11	No	No	Yes	No	No	Yes	Yes	No	Yes	No	No		1	4	1	4	1	1		1	1	1	1	1	1	1	1	1	1	1	1	1	1	1	1	5	1	1	5	5	5	Yes	Yes	Yes	Yes	Yes	Yes	Yes	Yes
22/11	No	No	Yes	No	No	Yes	Yes	No	Yes	No	No		1	4	1	4	1	1		1	1	1	1	1	1	1	1	1	1	1	1	1	1	1	1	5	1	1	5	5	5	Yes	Yes	Yes	Yes	Yes	Yes	Yes	Yes
22/11	No	No	Yes	No	No	No	Yes	No	No	No	No		1	1	1	4	1	1		3	1	1	1	1	1	1	1	1	1	1	1	1	1	2	2	4	1	1	2	3	4	I don't know	Yes	Yes	Yes	Yes	Yes	Yes	Yes
22-11				Yes		Yes	Yes			Yes	Yes	natura in città	1	1	1	4	1	1		2	1	1	1	1	1	1	1	1	2	1	1	1	1	2	2	4	1	1	3	3	4	Yes	Yes
22/11		No	No	No	Yes	No	No	Yes	Yes	No	No		1	2	3	-99	1	1		4	1	1	2	1	1	1	2	3	2	2	1	1	1	1	1	4	1	1	1	3	4	Yes	Yes	No	Yes	I don't know	I don't know	Yes	No
22/11	No	Yes	No	No	No	Yes	Yes	No	No	No	No		2	2	3	4	1	1		3	1	1	1	1	2	2	1	1	2	3	1	1	1	1	1	5	1	1	2	3	3	I don't know	Yes	Yes	Yes	Yes	Yes	Yes	No
22-11	Yes			Yes		Yes	Yes			Yes	No		1	1	1	4	1	1		1	1	1	1	1	2	3	1	1	5	1	1	1	1	1	1	5	1	1	4	4	5	No	No	No	No	No	No	No	No
22-11											No		1	1	1	1	1	1		1	1	1	1	1	1	1	1	1	1	1	1	1	1	1	1	2	1	1	2	4	5		Yes
22-11										Yes	Yes		1	1	1	2	1	1		3	1	1	1	1	2	1	1	2	3	2	1	2	1	2	2	3	1	1	2	2	5
22/11	No	No	No	No	No	No	No	No	No	No	Yes	Tecniche di produzione riadattate alla città	1	3	1	4	1	1		3	1	1	2	1	1	2	2	1	3	1	1	1	1	1	1	3	1	1	5	5	5	I don't know	I don't know	I don't know	Yes	I don't know	I don't know	I don't know	I don't know
22/11	No	No	No	No	No	Yes	Yes	No	No	Yes	No		1	2	3	-99	1	1		3	1	1	1	1	1	1	1	1	1	1	1	1	1	1	1	4	1	1	3	3	3	Yes	Yes	Yes	Yes	Yes	Yes	Yes	Yes
22-11											No		1	1	2	2	1	2		2	1	1	1	1	1	1	1	1	2	1	1	2	1	1	1	2	1	1	1	1	3	Yes	Yes	Yes	Yes			Yes	Yes
22-11						Yes	Yes			Yes	Yes	agricoltura più accessibile a tutti	1	1	1	5	1	2		3	1	1	1	1	1	1	4	4	5	1	1	1	1	1	1	1	1	1	3	3	5	No	No	No	No	No	No	No	No
12-11										Yes	Yes		1	1	1	2	2	2		1	1	2	1	1	2	2	1	1	1	1	2	1	1	1	1	5	1	1	1	1	5
12-11						Yes					Yes		1	1	1	3	1	1		4	1	1	1	1	1	1	1	2	5	2	2	4	1	1	1	2	1	1	1	2	2	Yes	Yes	Yes	Yes
12-11										Yes	Yes		1	1	1	4	1	1		5	1	1	1	1	1	2	1	1	5	1	1	2	1	1	1	5	1	1	5	5	5
12-11							Yes			Yes	No		1	1	1	4	1	2		1	2	1	1	2	2	1	1	2	1	1	2	1	1	1	1	2	1	1	1	2	5	Yes	Yes	Yes	Yes	Yes	Yes	Yes	Yes
22/11	No	No	No	No	No	No	No	No	No	Yes	Yes	Insegnare le tecniche di produzione	1	2	2	4	1	1		3	1	1	1	1	1	1	4	3	3	3	1	3	1	2	2	3	1	1	1	1	2	Yes	Yes	Yes	Yes	I don't know	I don't know	I don't know	I don't know
12-11						Yes					No		1	1	1	5	1	1		4	1	1	2	2	1	2	2	1	1	2	2	1	2	1	1	2	1	1	5	5	5	Yes	Yes	Yes
12-11						Yes					Yes		1	1	1	4	1	1		4	1	1	1	1	1	1	1	1	4	4	1	1	1	1	1	4	1	1	4	5	5	Yes	Yes	Yes
15-11							Yes				Yes	è l'agricoltura che si fa in città, come per esempio la costruzione di piccoli orti su balconi e tetti, o l'utilizzo di parti di giardini per l'agricoltura	1	1	1	4	1	2		3	1	2	1	1	3	2	1	1	1	2	-99	1	1	2	4	4	1	2	2	5	5	Yes	Yes	No	Yes			Yes	Yes
28/10	No	Yes	No	Yes	Yes	No	Yes	No	No	No	Yes		1	1	1	3	1	1		2	1	1	1	1	1	1	1	1	1	1	1	1	1	1	1	2	1	1	2	3	3	Yes	Yes	Yes
15-11				Yes			Yes				No		1	1	1	5	1	1		3	1	1	1	1	1	1	2	2	2	1	1	2	1	1	1	3	1	1	2	3	3	Yes	Yes	Yes	Yes			Yes	Yes
15-11	Yes									Yes	No		1	1	1	5	1	1		3	1	1	1	1	1	1	2	2	2	2	1	1	1	1	1	2	1	1	2	2	2	Yes	Yes	Yes	Yes	Yes	No	Yes	Yes
28/10	No	No	No	No	No	Yes	Yes	No	No	No	Yes	Progetti per conoscere l'agricoltura	1	1	1	3	1	1		4	1	1	2	1	1	1	1	1	4	3	4	4	2	1	1	2		1	3	4	4	Yes	Yes	Yes
28/10	No	No	No	Yes	No	No	No	No	No	Yes	No	Coltivazioni vicino alle città	1	1	2	5	1	3		5	3	5	-99	-99	3	5	1	1	1	1	1	1	5	1	1	1	1	1	1	1	1		Yes
28/10	No	No	No	No	No	Yes	No	No	No	No	No	Coltivate prodotti in città	1	1	2	3	1	2		1	2	2	1	1	1	3	3	2	1	1	1	3	1	1	2	2	1	2	2	1	4		Yes		Yes	Yes		Yes
28/10	No	No	No	No	No	No	No	No	No	Yes	Yes		1	1	1	-99	1	1		5	1	1	1	1	1	1	1	1	1	1	1	1	1	1	1	4	1	1	4	5	5	Yes	Yes	Yes
28/10											Yes	Riqualificazione di aree coltivabili ad uso della comunità	4	1	1	3	1	1		4	1	1	1	1	4	2	1	2	2	2	5	1	1	1	1	5	1	1	3	4	5
28/10	No	No	No	No	No	No	Yes	No	No	Yes	Yes	Produrre frutta e verdure in diversi modi in città	1	1	1	5	1	1		4	1	1	1	1	1	1	1	1	1	1	5	1	1	1	1	3	1	1	4	5	5	Yes	Yes	Yes
28/10	No	No	No	No	Yes	Yes	Yes	No	No	No	Yes	Poter coltivare in città	2	2	1	2	1	1		2	2	2	1	1	1	2	2	2	1	1	1	2	2	1	1	2	1	1	3	4		Yes	Yes	Yes	Yes	Yes	Yes	Yes	Yes
28/10	No	No	No	No	No	Yes	No	No	No	No	Yes	Utilizzo di aree urbane per produzione agricola e manutenzione del verde	1	1	1	1	1	1		1	1	1	1	1	1	3	1	3	3	3	4	5	1	1	4	5	1	1	1	3	1	Yes	Yes	Yes	Yes	Yes	Yes	Yes	Yes
28/10	No	No	No	No	No	Yes	Yes	No	No	No	No		1	1	1	2	2	2		1	1	1	1	2	2	2	1	1	1	1	1	1	2	2	2	2	2	2	2	2	5	Yes	Yes	Yes
28/10	No	Yes	No	No	No	Yes	Yes	No	No	No	Yes		1	1	1	4	1	1		3	2	2	2	2	2	2	3	3	3	2	2	2	2	1	1	2	1	1	2	3	4		Yes	Yes
28/10	No	Yes	No	No	Yes	Yes	No	No	No	No	Yes	Programmi inerenti alla natura	1	1	1	1	1	1		1	1	1	1	1	1	1	1	1	1	1	1	1	1	1	1	4	1	1	5	5	5	Yes	Yes	Yes	Yes			Yes
28/10	No	Yes	No	No	No	No	Yes	No	No	No	Yes	Mezzoper incentivare la Popolazione ad utilizzare spazi pubblici per dedicarsi alla coltivazione	1	3	1	5	1	2		2	2	3	3	5	5	-99	3	1	3	3	4	4	2	2	4	4	1	3	3	3	4
28/10	No	No	No	No	No	No	Yes	No	No	No	Yes		1	1	1	5	1	1		5	1	1	3	1	1	1	1	1	1	1	1	1	1	1	1	3	2	2	2	4	4	Yes	Yes	Yes		Yes		Yes
28/10	No	No	No	No	No	No	Yes	No	No	No	Yes		1	1	1	5	1	1		5	1	1	3	1	1	1	1	1	1	1	1	1	1	1	1	3	2	2	2	4	4	Yes	Yes	Yes		Yes		Yes
28/10	No	No	No	No	No	Yes	Yes	No	No	Yes	Yes	Agricoltura in città per la comunità	1	1	1	1	1	2		1	1	2	1	1	1	1	2	2	2	1	1	1	1	1	1	1	1	1	3	3	3
28/10	No	Yes	No	No	No	Yes	No	No	No	No	Yes	Ortaggi a km 0	1	1	1	2	2	1		1	1	2	1	2	2	2	2	1	1	1	1	2	2	1	1	1	2	1	1	1	3
28/10	No	No	No	No	No	No	Yes	No	No	Yes	No		1	1	2	1	1	1		1	2	2	1	1	2	2	1	1	1	2	1	1	1	1	1	1	1	1	1	1	5
28/10	No	No	No	No	No	Yes	No	No	No	No	Yes	Modo di evitare il supermercato	1	1	1	5	1	2		5	1	1	1	1	1	2	1	1	2	1	1	1	1	1	1	5	1	1	5	1	5	Yes		Yes	Yes	Yes	Yes	Yes	Yes
28/10	No	No	No	No	No	Yes	Yes	No	No	No	Yes	Coltivare insieme ad altri in un posto diverso dalla campagna	1	1	2	2	1	1		1	2	1	1	1	1	2	2	1	1	1	1	1	1	1	1	5	1	1	1	3	4	No	No
28/10	No	No	No	No	Yes	Yes	Yes	No	No	Yes	Yes		1	1	1	1	2	1		1	1	2	2	2	1	1	1	1	1	1	1	1	2	1	1	4	1	1	2	2	5
28/10	No	No	No	Yes	No	No	Yes	No	No	Yes	No		1	1	2	1	2	1		2	2	1	1	1	1	1	1	1	1	1	1	1	1	1	1	3	1	1	1	3	3
28/10	No	No	No	No	No	Yes	Yes	No	No	Yes	No		1	1	2	2	2	1		1	1	1	2	1	1	1	1	2	2	2	1	1	1	1	1	4	1	1	2	2	5
28/10	No	No	No	No	No	No	Yes	No	No	No			1	1	1	2	2	1		1	1	1	2	1	1	1	1	1	1	1	1	1	1	1	1	5	1	1	1	1	5
28/10	No	No	No	No	No	Yes	Yes	No	No	No	Yes		1	1	1	1	2	1	1	1	1	1	2	2	2	1	1	1	1	1	1	1	1	1	1	5	1	1	1	3	5
28/10	No	No	No	No	No	No	Yes	No	No	No	No		1	2	2	1	1	1		1	1	2	1	1	1	2	2	2	1	1	1	1	1	1	1	5	1	1	2	5	5
28/10	No	No	No	No	No	No	Yes	No	No	No	No		1	2	1	1	1	2		1	1	2	2	2	1	1	2	1	1	2	1	2	2	1	1	2	1	1	1	1	2
28/10	No	No	No	No	No	Yes	Yes	No	No	Yes	No		1	1	2	2	2	2		1	1	1	1	2	1	1	1	1	2	2	1	1	1	1	1	2	1	1	3	3	3
28/10	No	No	No	No	No	Yes	Yes	No	No	Yes	No		1	1	2	2	2	2		1	1	1	1	2	1	1	1	1	2	2	1	1	1	1	1	2	1	1	3	3	3
28/10	No	Yes	No	No	No	No	No	Yes	No	No	No	Orti in comune	1	1	2	2	1	1		2	1	1	2	1	1	2	2	1	2	3	-99	-99	-99	2	1	5	1	1	1	1	5
28/10	No	Yes	No	No	No	Yes	No	No	No	No	No	Autoconsumo per la famiglia	2	1	2	1	2	1		2	1	2	3	3	2	1	1	3	4	5	-99	-99	-99	2	2	4	1	1	1	1	4	No
28/10	No	Yes	No	No	No	Yes	No	No	Yes	No	No		1	1	1	3	1	1		1	1	1	1	1	1	1	1	1	1	1	1	1	1	3	3	3	3	3	1	1	2	Yes	Yes	Yes	Yes	Yes	Yes	Yes	Yes
28/10	No	No	No	Yes	No	No	No	Yes	No	No	No		1	1	2	2		1		1	1	2	2	1	2	3	3	3	5	5	-99	-99	-99	2	1	2	1	1	3	4	5			Yes
28/10	No	No	No	No	No	Yes	No	No	No	Yes	Yes	Coltivare negli spazi in disuso	2	1	1	5	4	3		1	1	1	3	2	4	5	2	2	2	5	5		5	1	1	4	1	1	1	1	3
28/10	No	No	No	No	No	No	Yes	No	No	Yes	No	Coltivare sui tetti	1	2	1	1	1	3		3	2	2	3	1	5	1	4	2	2	3	2	5	5	1	2	4	1	1	1		4
28/10	No	No	Yes	No	Yes	No	No	No	No	No	No		1	1	1	4	2	2		1	1	1	3	1	4	-99	5	4	2	2	2	1	1	2	2	4	2	1	1	2	1	Yes	Yes
28/10	No	No	No	No	Yes	Yes	No	No	No	No		Stare insieme e coltivare in spazi comuni	1	1	1	3	1	1		1	1	1	1	2	2	2	3	1	1	1	5	5	3	1	2	4	1	1	4	4	5
28/10	No	No	No	No	No	Yes	No	No	Yes	No	Yes	Sfruttare gli spazi per farci orti	1	1	1	3	3	1		1	1	2	2	2	1	1	2	2	3	3	3	4		1	1	3	1	1	1		5
28/10	No	No	No	No	Yes	No	Yes	No	No	No	Yes	Orti sui tetti	1	1	1	3	3	2		1	1	1	2	2	1	5	5	5	5	2	5	5	5	1	1	2	1	1	2	2	3
28/10	No	No	No	No	Yes	Yes	No	No	No	No	Yes	Orti verticali	2	1	1	2	3	2		1	3	2	1	1	2	2	1	3	4	4	4	4	3	1	1	2	1	1	1	2	5	Yes
28/10	No	No	No	No	No	Yes	No	No	No	Yes	No	Coltivare nei parchi	2	1	1	4	2	4		1	1	1	1	2	1	2	2	2	4	5	5	-99	-99	1	1	5	3	2	1	1	4
28/10	No	No	No	Yes	No	No	No	No	No	No	No		1	1	1	1	1	2		2	3	2	3	1	1	1	2	3	2	1	1	2	3	1	1	3	1	2	1	1	5
28/10	No	No	No	No	No	Yes	No	No	No	Yes	Yes	Coltivare in centro	1	1	1	1	1	2		2	2	2	3	1	1	3	1	1	4	4	4	5	5	2	2	5		2	1	1	4
28/10	No	No	No	No	No	Yes	No	No	No	Yes	Yes	Ortaggi sui balconi o tetti	1	2	2	2	1	1		2	1	2	1	1	1	4	1	1	1	1	3	1	1	1	1	1	2	2	4	4	5	Yes	Yes	Yes
28/10	No	No	No	No	No	Yes	Yes	No	No	No	No		1	1	1	2	2	1		1	1	1	2	2	1	4	4	3	2	3	3	3	4	1	1	1	2	1	1	1	5
28/10	Yes	Yes	No	No	No	No	No	No	No	No	No		1	1	1	3	1	1		1	1	2	2	1	1	1	2	2	2	2	2	2	2	1	1	5	1	1	3	3	3
28/10	No	No	Yes	No	No	Yes	No	No	No	No	No		1	1	1	1	1	1		2	2	2	1	2	2	2	1	1	1	1	2	2	2	1	1	2	1	1	2	2	2
28/10	No	No	No	No	No	Yes	No	No	No	Yes	No	Orti in comune nei giardini	2	1	1	1	2	2		1	1	1	2	2	1	1	1	2	2	2	1	1	2	1	1	1	1	2	2	2	4
28/10	No	No	No	No	Yes	Yes	No	No	No	Yes	Yes	Comunità partecipe alla coltivazione	2	1	1	1	2	2		1	1	1	1	1	1	1	1	2	2	2	2	2	2	2	2	3	1	2	2	1	4
[truncated: 76 more columns]
